# Supplementary material for: Synthesis and In Silico Docking of New Pyrazolo[4,3-e]Pyrido[1,2-a]Pyrimidine-Based Cytotoxic Agents
Source: Preprints.org preprint supplement (doi:10.20944/preprints202109.0188.v1), 2021-09-10

## Supplementary material

### Synthesis and *in silico* docking of new pyrazolo[4,3-*e*]pyrido[1,2-*a*]pyrimidine-based cytotoxic agents

Mabrouk Horchani <sup>1</sup>, Niels V. Heise <sup>2</sup>, Sophie Hoenke <sup>2</sup>, René Csuk <sup>2,\*</sup>, Abdel Halim Harrath <sup>3</sup>, Hichem Ben Jannet <sup>1,\*</sup>, Anis Romdhane <sup>1</sup>

<sup>1</sup> Laboratory of Heterocyclic Chemistry, Natural Products and Reactivity, Medicinal Chemistry and Natural Products (LR11ES39), Faculty of sciences Monastir, University of Monastir, 5000 Monastir, Tunisia

<sup>2</sup> Organic Chemistry, Martin-Luther University Halle-Wittenberg, Kurt-Mothes Str. 2, D-06120 Halle (Saale), Germany

<sup>3</sup> King Saud University, Department of Zoology, College of Science, Riyadh, Saudi Arabia

#### 1. General

NMR spectra were recorded using the Agilent spectrometers DD2 500 MHz and VNMR5 400 MHz ( $\delta$  given in ppm, J in Hz; typical experiments: APT, H-H-COSY, HMBC, HSQC, NOESY), MS spectra were taken on an Advion Expression CMS instrument. TLC was performed on silica gel (Macherey-Nagel, detection with cerium molybdate reagent); melting points are uncorrected (Leica hot stage microscope, or BUCHI melting point M-565), and elemental analyses were performed on a Foss-Heraeus Vario EL (CHNS) unit. IR spectra were recorded on a Perkin Elmer FT-IR spectrometer Spectrum 1000 or on a Perkin-Elmer Spectrum Two (UATR Two Unit). The solvents were dried according to usual procedures.

#### 2. Cytotoxicity assay (SRB assay)

The cell lines were obtained from Department of oncology (Martin-Luther-University Halle Wittenberg). Cultures were maintained as monolayers in RPMI 1640 medium with L-glutamine (Capricorn Scientific GmbH, Ebsdorfergrund, Germany) supplemented with 10% heat inactivated fetal bovine serum (Sigma-Aldrich Chemie GmbH, Steinheim, Germany) and penicillin/streptomycin (1%, Capricorn Scientific GmbH, Ebsdorfergrund, Germany) at 37 °C in a humidified atmosphere with 5% CO<sub>2</sub>.

The cytotoxicity of the compounds was evaluated using the sulforhodamine-B (Kiton-Red S, ABCR) micro culture colorimetric assay using confluent cells in 96-well plates with the seeding of the cells on day 0 applying appropriate cell densities to prevent confluence of the

cells during the period of the experiment. On day 1, the cells were treated with six different concentrations (1, 3, 7, 12, 20 and 30  $\mu$ M); thereby, the final concentration of DMSO was always < 0.5%, generally regarded as non-toxic to the cells. On day 4, the supernatant medium was discarded; the cells were fixed with 10 % trichloroacetic acid. After another day at 4 °C, the cells were washed in a strip washer and dyed with the SRB solution (100  $\mu$ L, 0.4% in 1% acetic acid) for about 20 min to be followed by washing of the plates (four times, 1% acetic acid) and air-drying overnight. Furthermore, tris base solution (200  $\mu$ L, 10 mM) was added to each well and absorbance was measured at  $\lambda = 570$  nm employing a reader (96 wells, Tecan Spectra, Crailsheim, Germany). The EC<sub>50</sub> values were averaged from three independent experiments performed each in triplicate calculated from semi logarithmic dose response curves applying a non-linear four-parameter Hills-slope equation (GraphPad Prism5; variables top and bottom were set to 100 and 0, respectively).

### 3. Spectra of 3:

$^1\text{H}$  NMR (500 MHz,  $\text{CDCl}_3$ ):

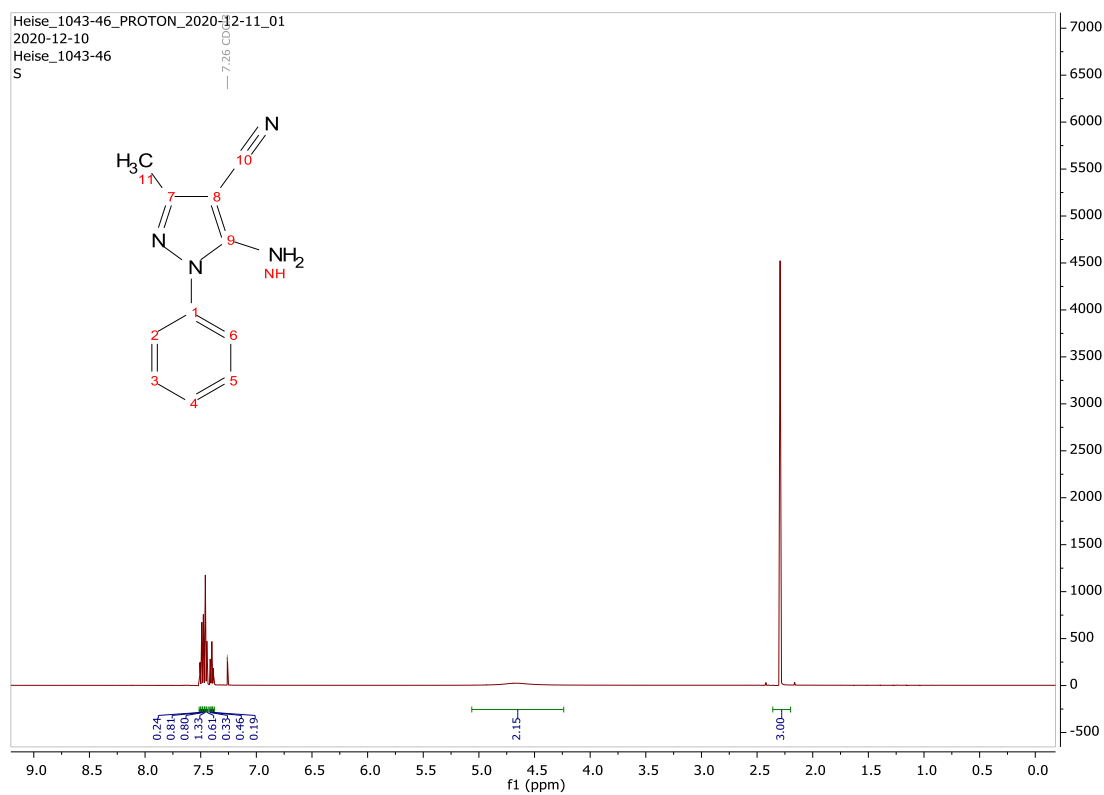

$^{13}\text{C}$  NMR (126 MHz,  $\text{CDCl}_3$ ):

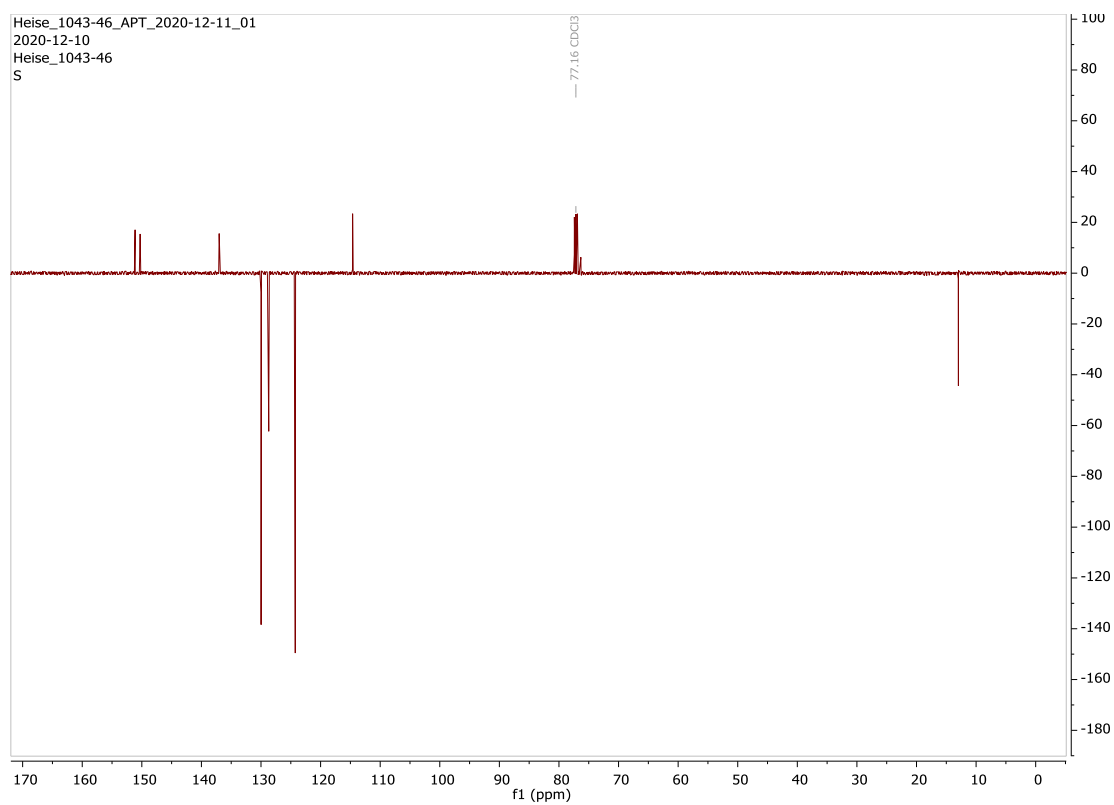

IR spectrum (ATR):

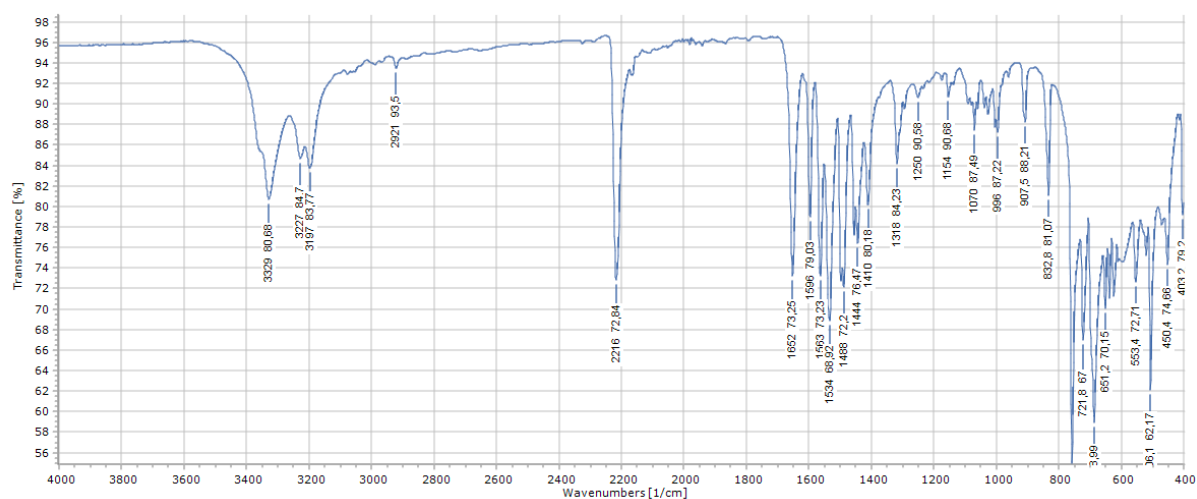

Spectra of 5:

<sup>1</sup>H NMR (500 MHz, CDCl<sub>3</sub>):

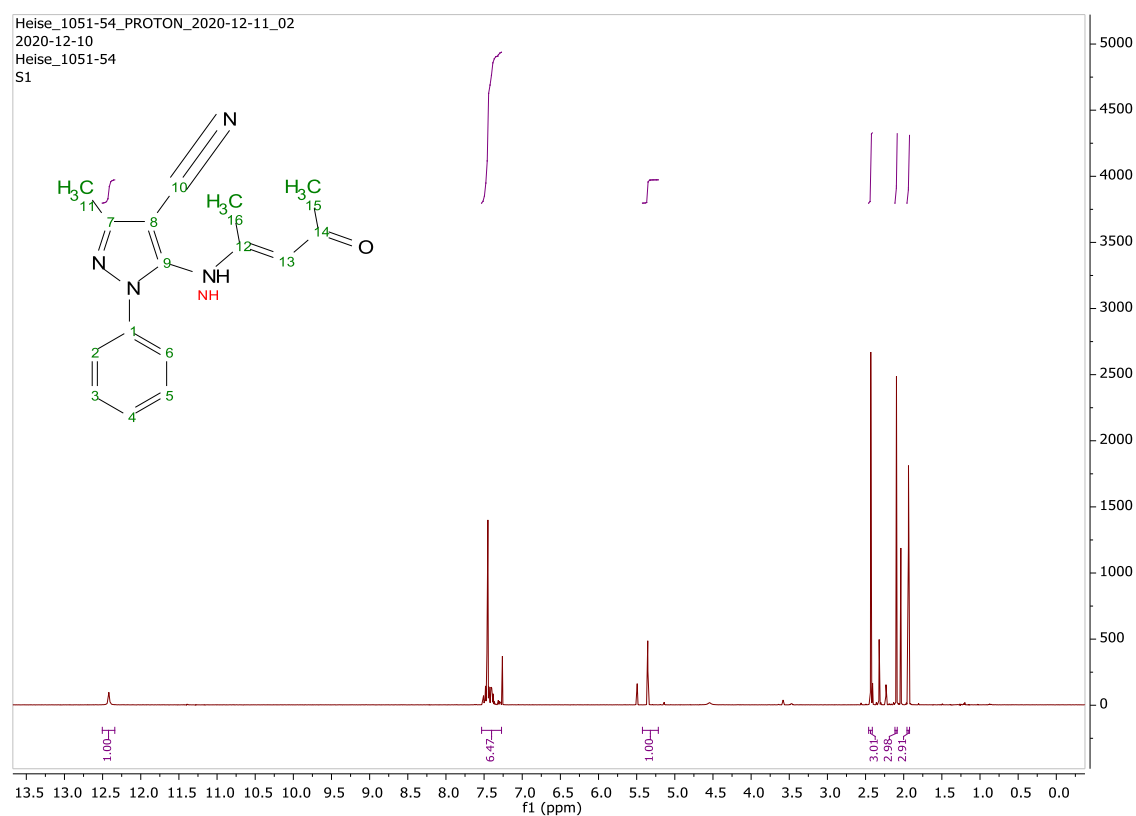

$^{13}\text{C}$  NMR (126 MHz,  $\text{CDCl}_3$ ):

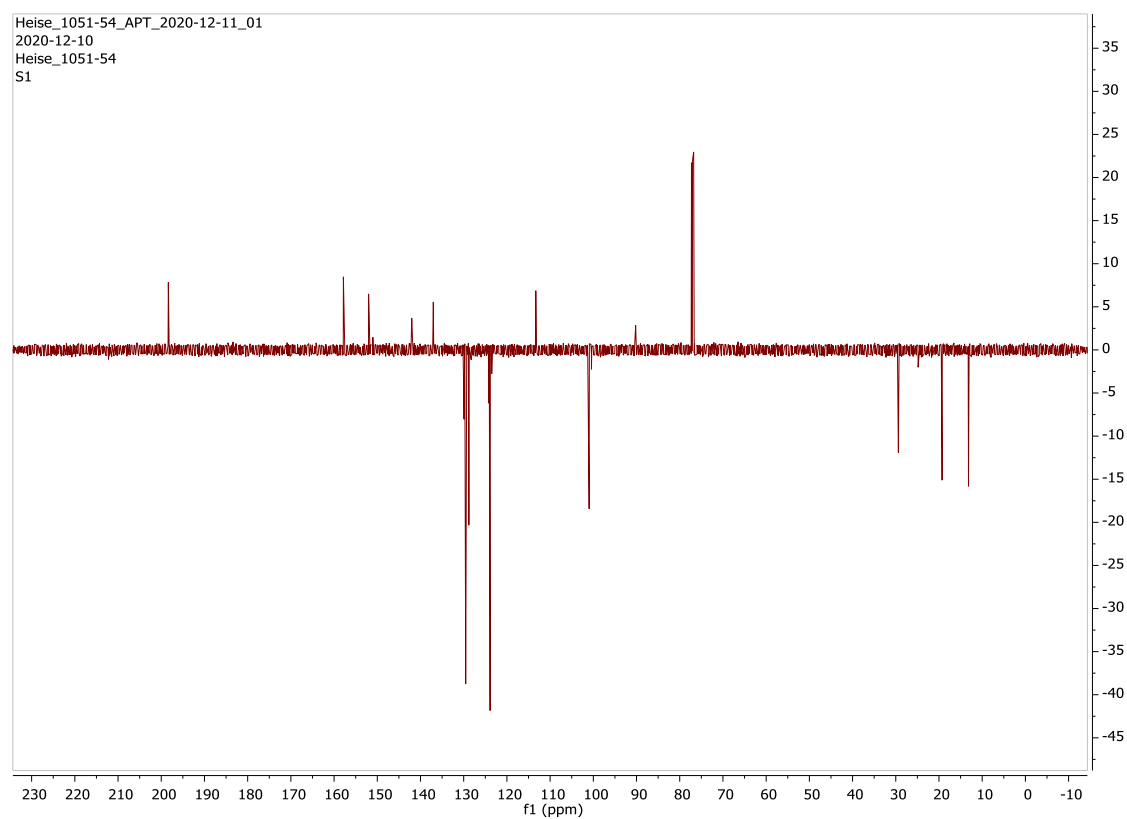

IR spectrum (ATR):

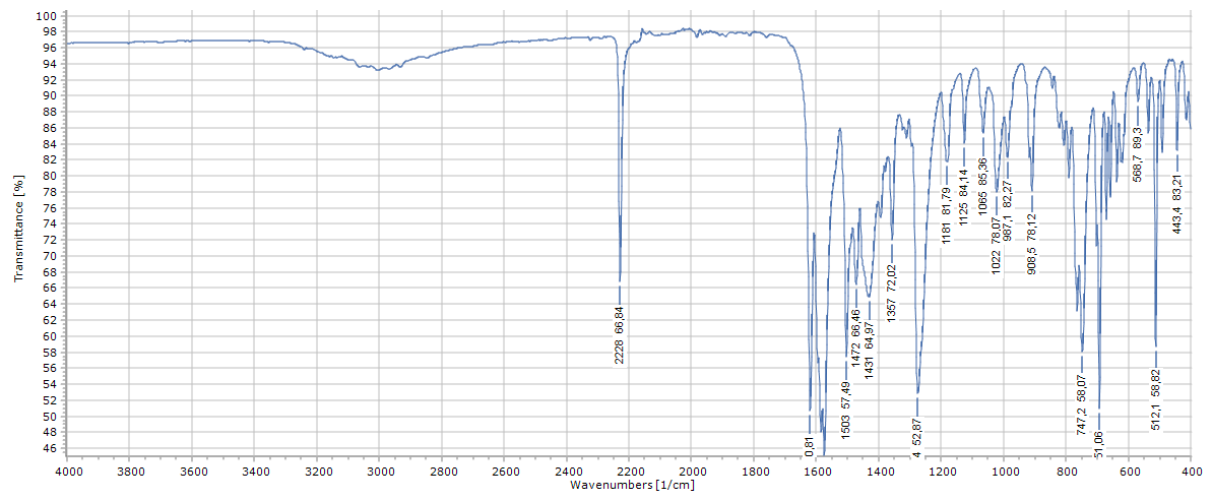

## Spectra of 7a:

$^1\text{H}$  NMR (500 MHz,  $\text{CDCl}_3$ ):

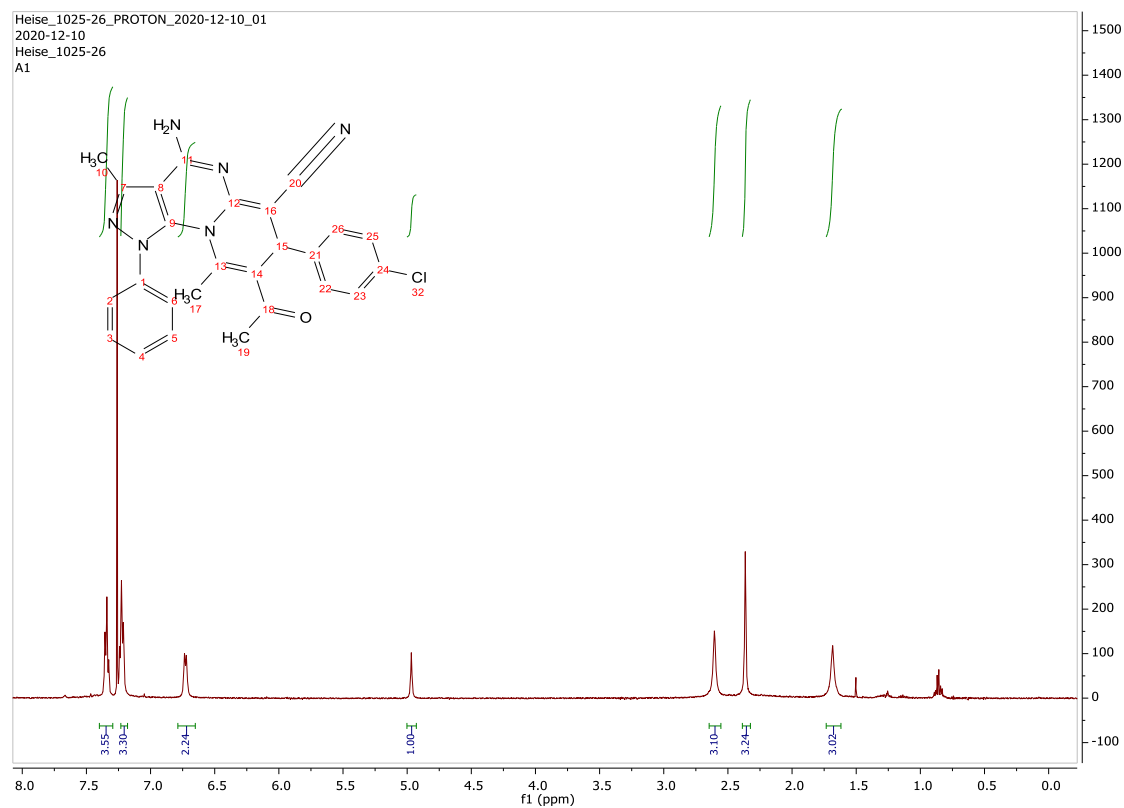

$^{13}\text{C}$  NMR (126 MHz,  $\text{CDCl}_3$ ):

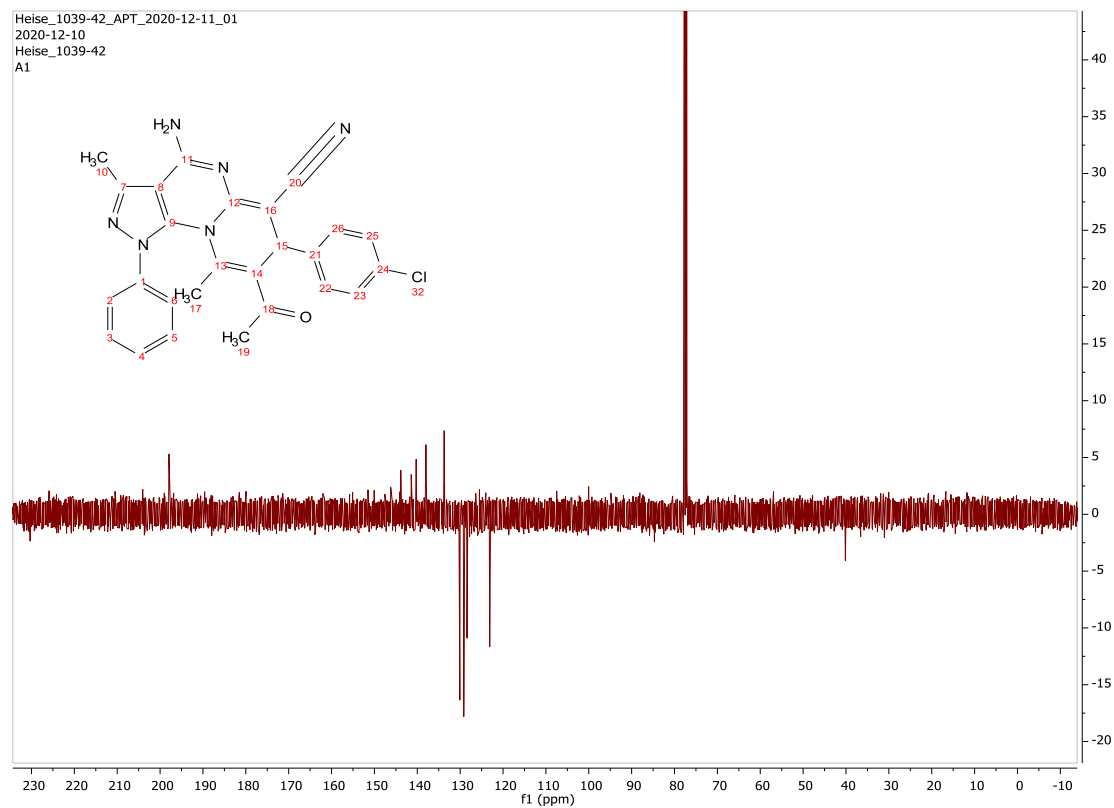

IR spectrum (ATR):

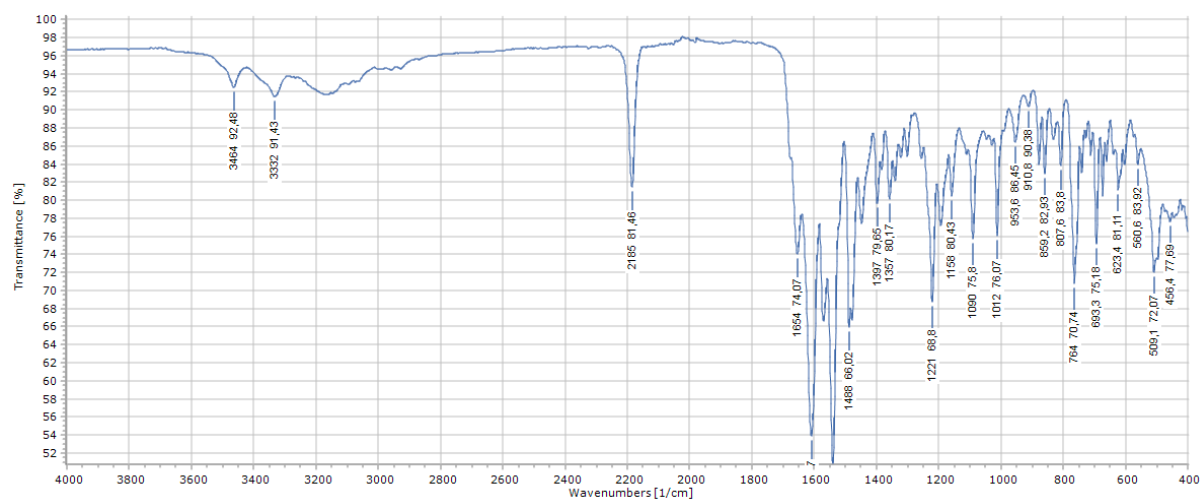

Spectra of 7b:

<sup>1</sup>H NMR (500 MHz, CDCl<sub>3</sub>):

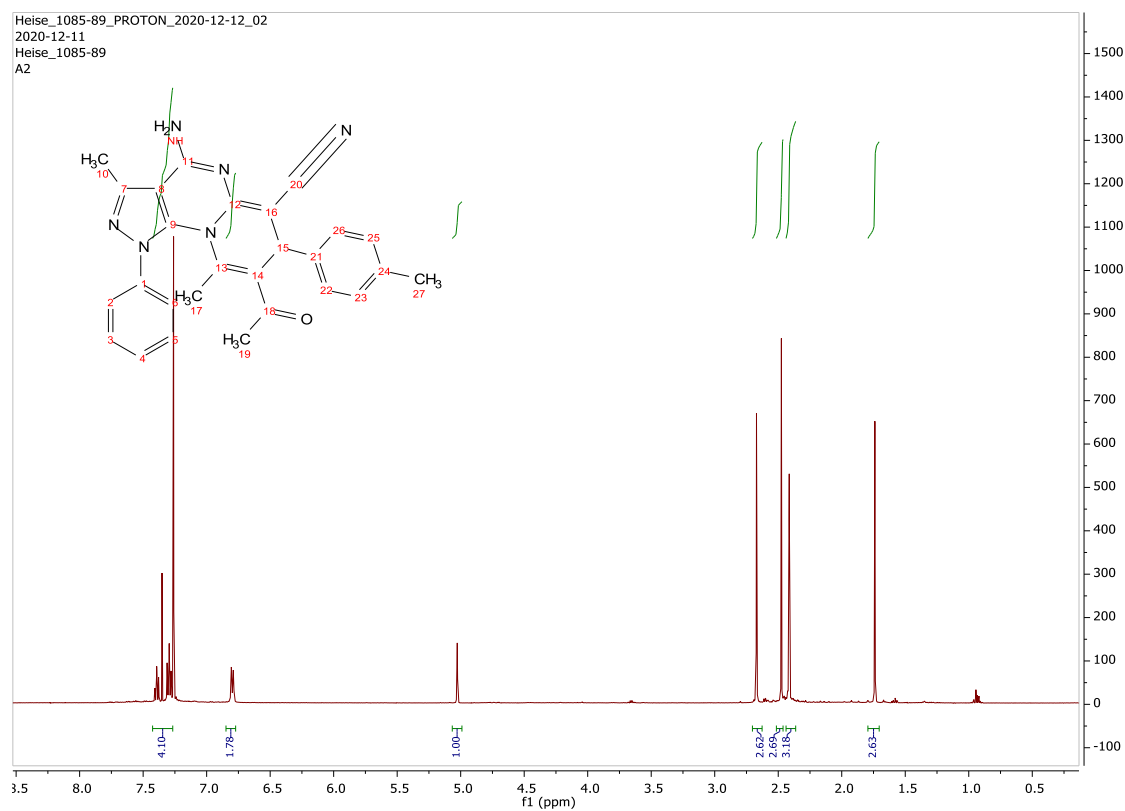

$^{13}\text{C}$  NMR (126 MHz,  $\text{CDCl}_3$ ):

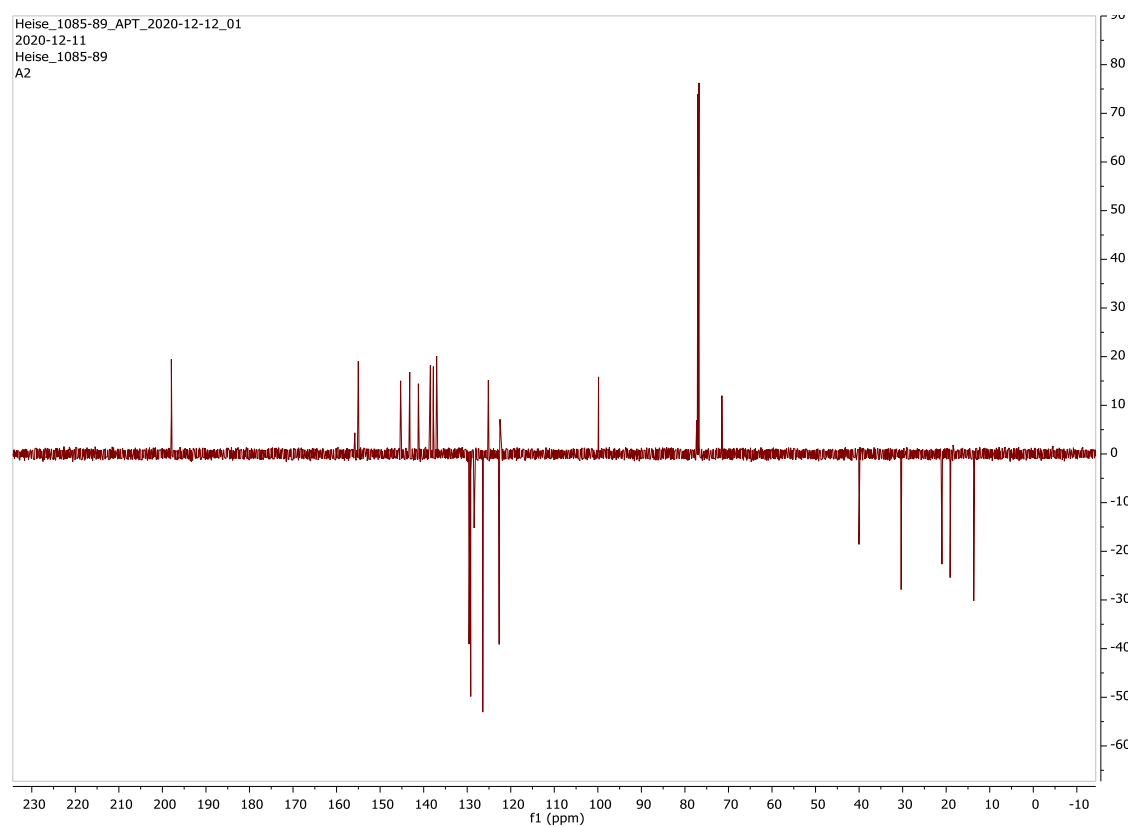

IR spectrum (ATR):

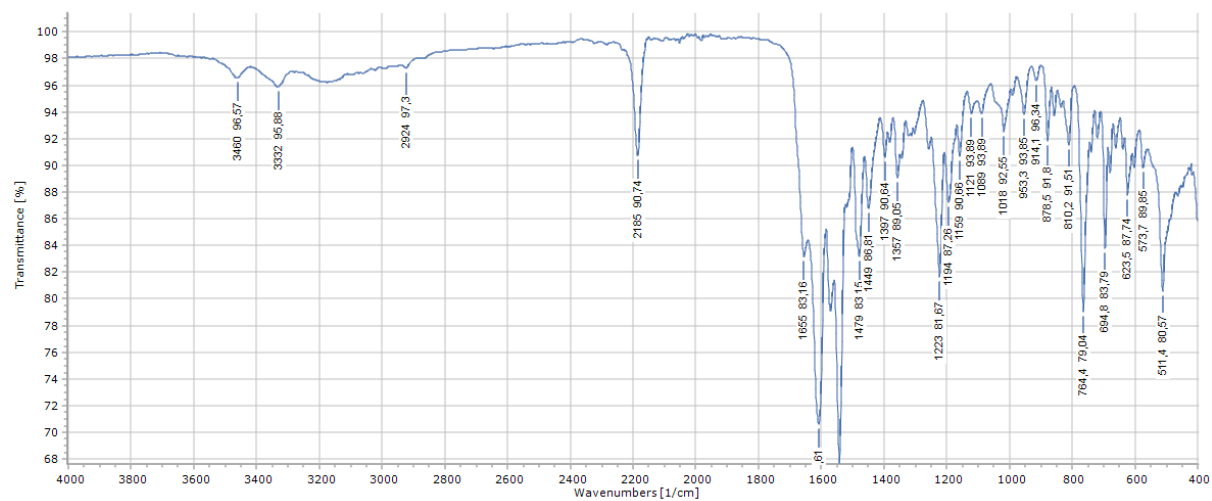



## Spectra of 7c:

$^1\text{H}$  NMR (500 MHz,  $\text{CDCl}_3$ ):

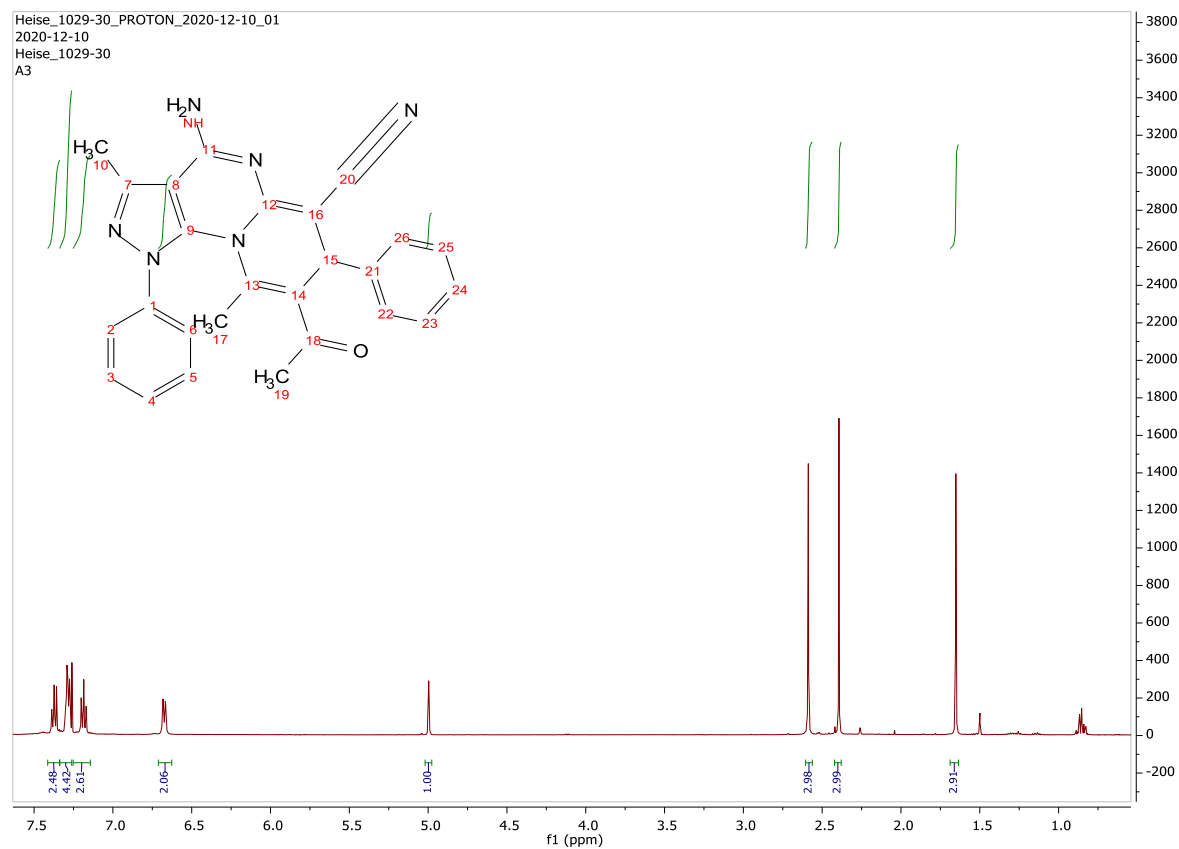

$^{13}\text{C}$  NMR (126 MHz,  $\text{CDCl}_3$ ):

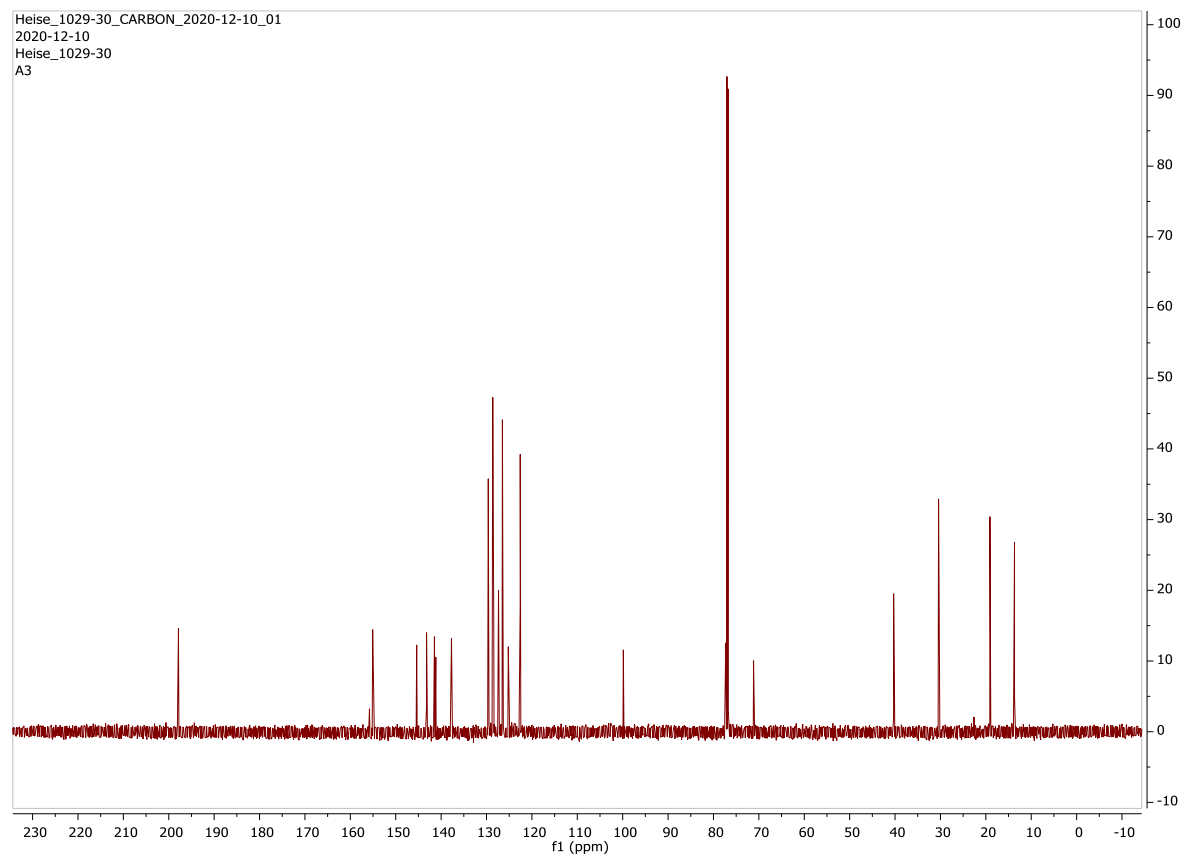

IR spectrum (ATR):

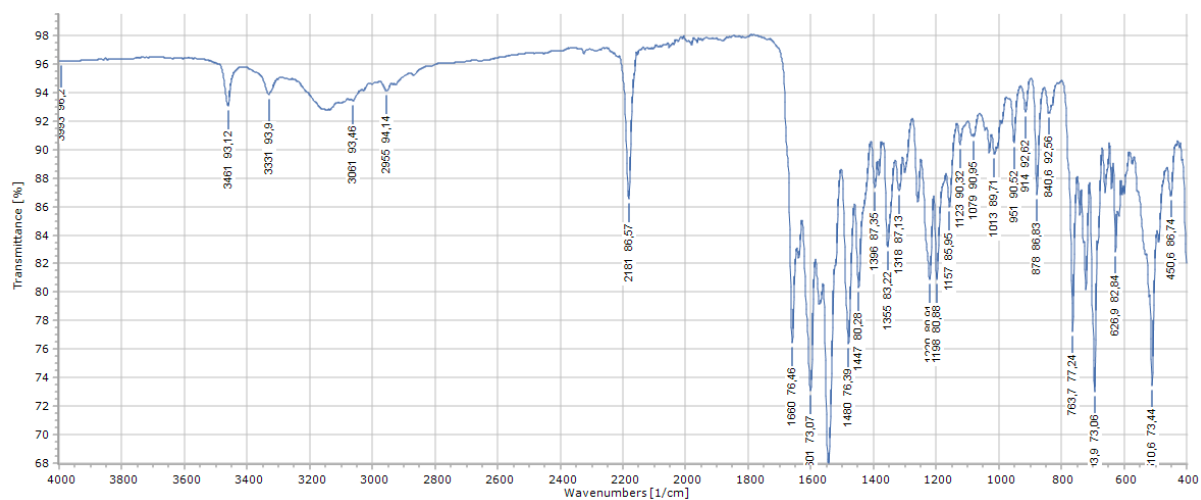

Spectra of 7d:

$^1\text{H}$  NMR (500 MHz,  $\text{CDCl}_3$ ):

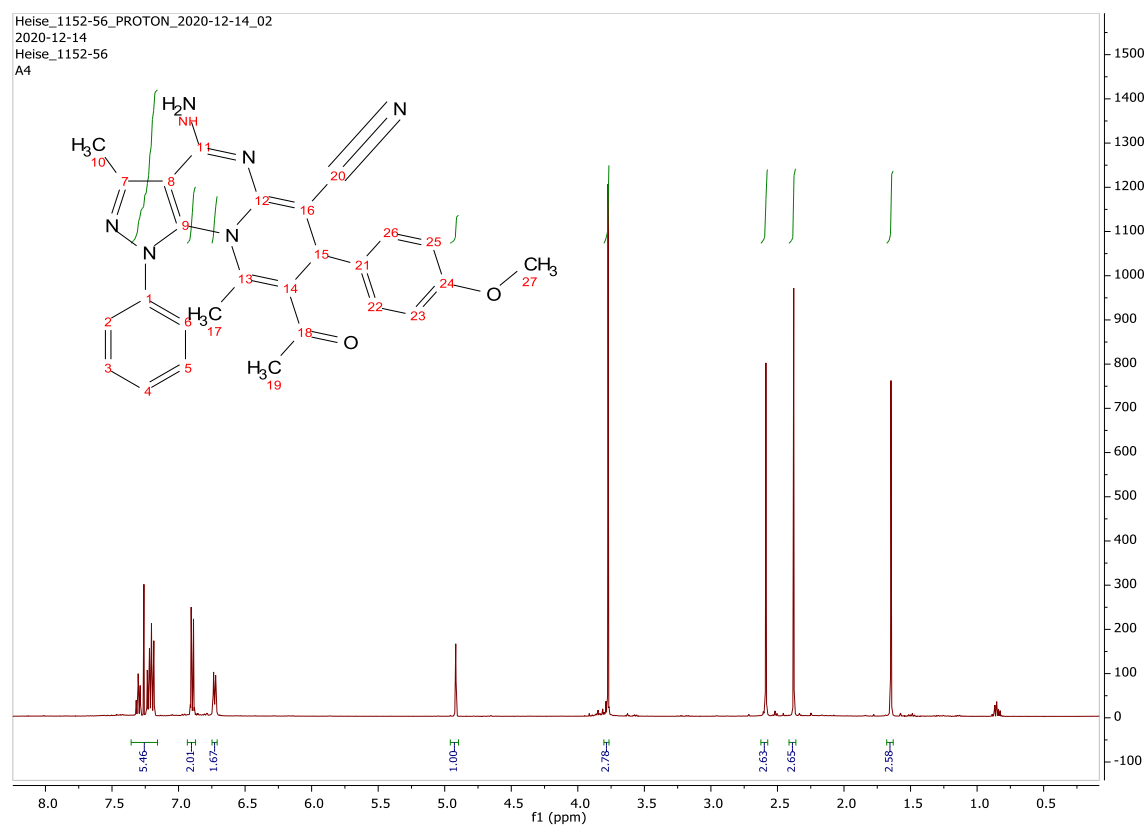

$^{13}\text{C}$  NMR (126 MHz,  $\text{CDCl}_3$ ):

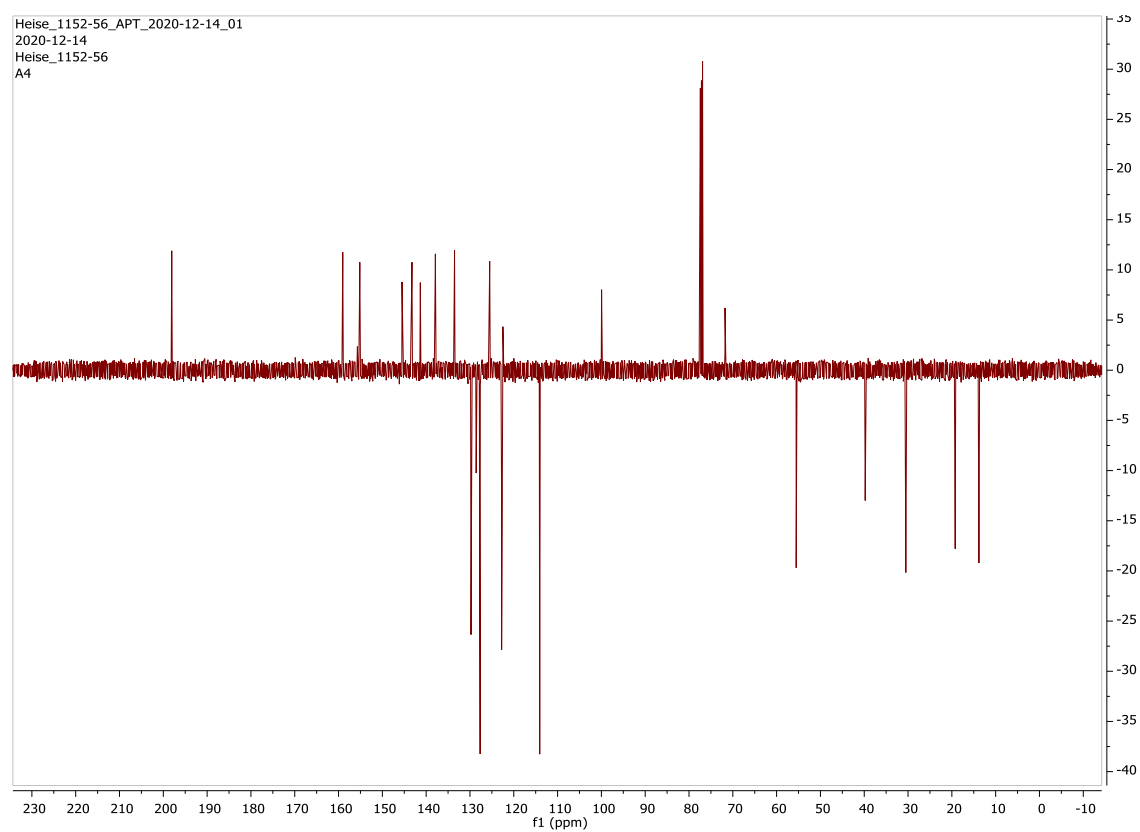

IR spectrum (ATR):

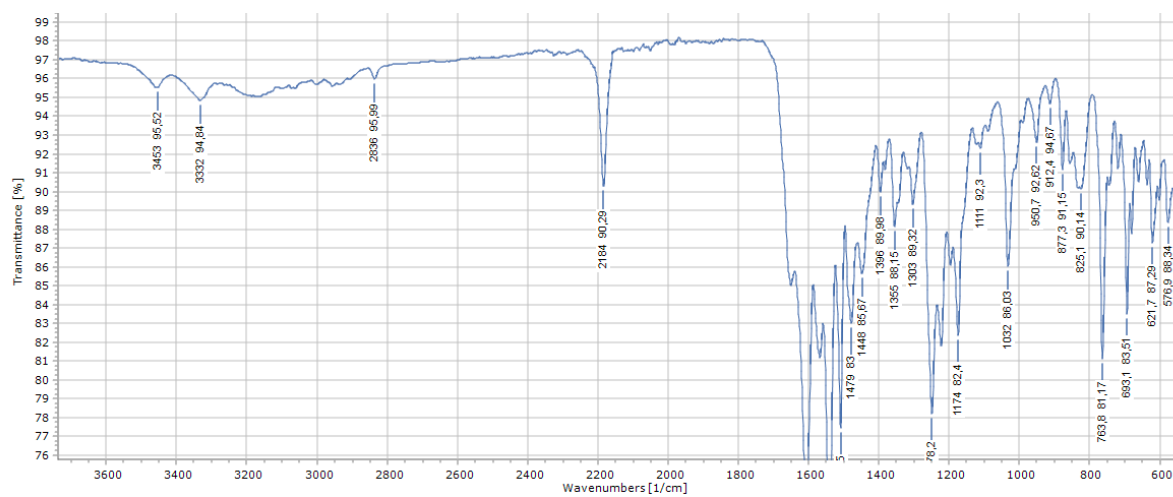

## Spectra of 7e:

$^1\text{H}$  NMR (500 MHz,  $\text{CDCl}_3$ ):

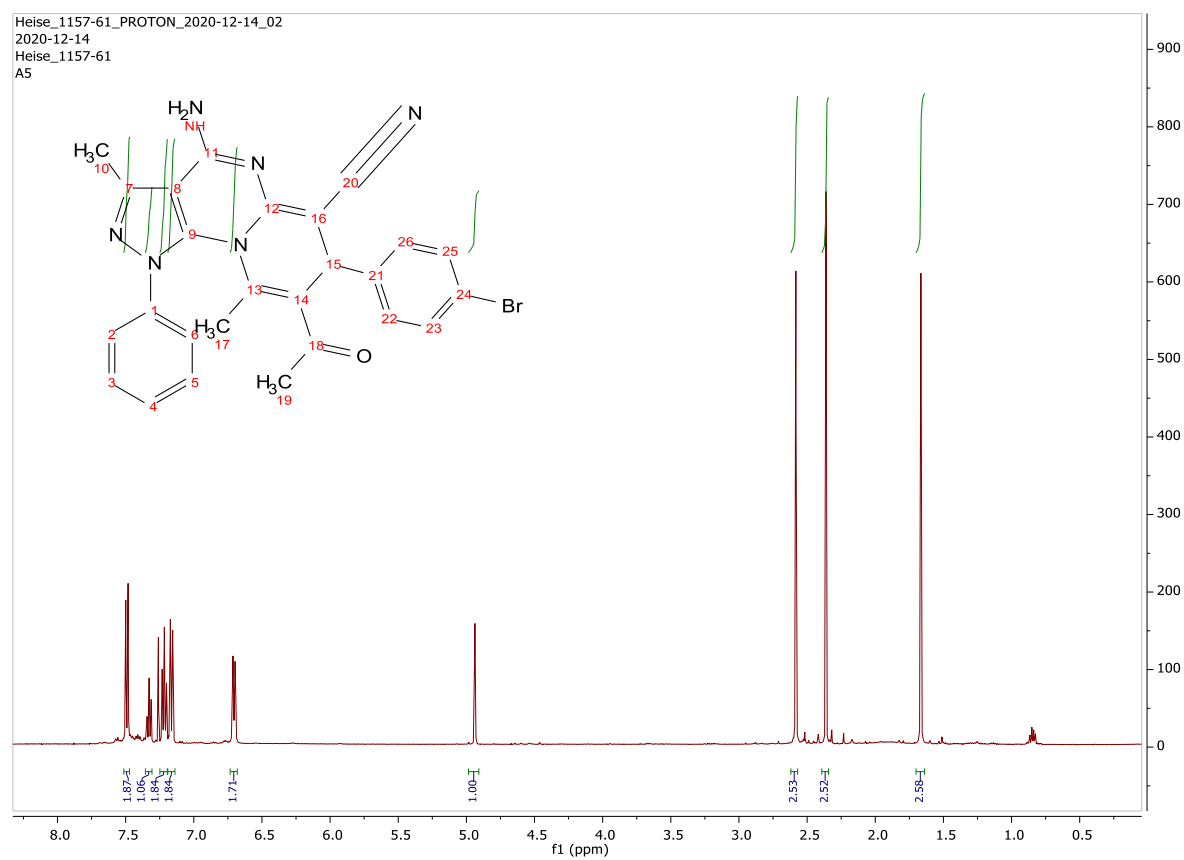

$^{13}\text{C}$  NMR (126 MHz,  $\text{CDCl}_3$ ):

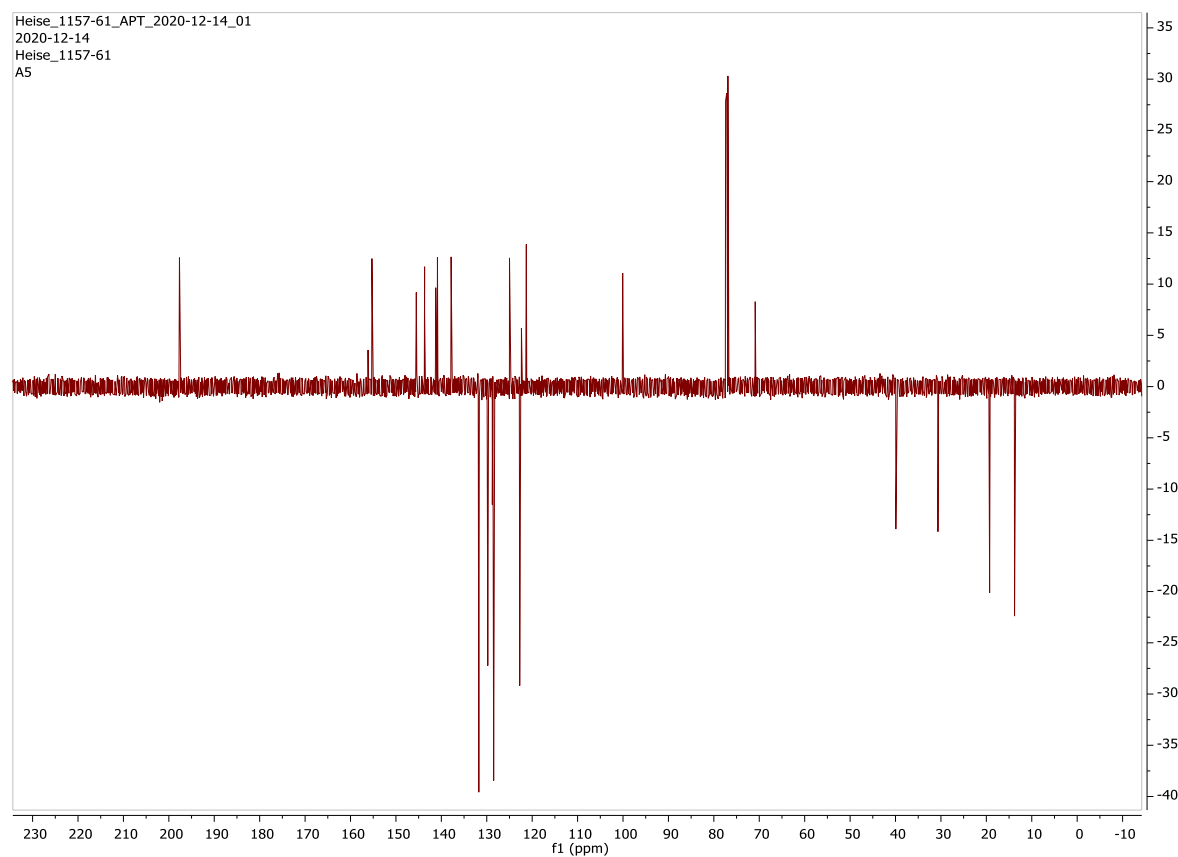

IR spectrum (ATR):

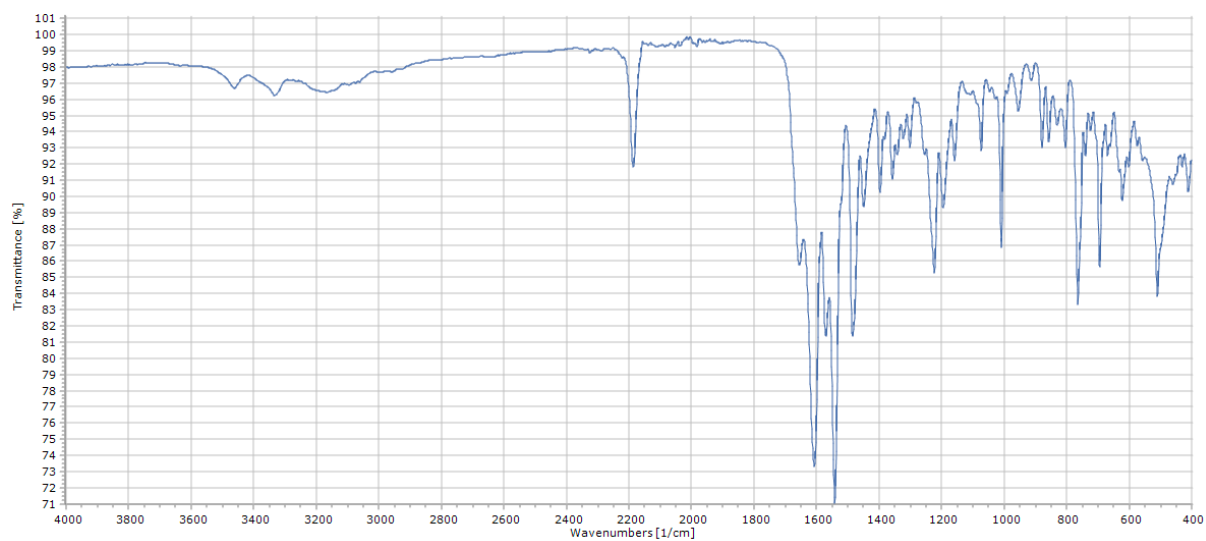

Spectra of 7f:

$^1\text{H}$  NMR (500 MHz,  $\text{CDCl}_3$ ):

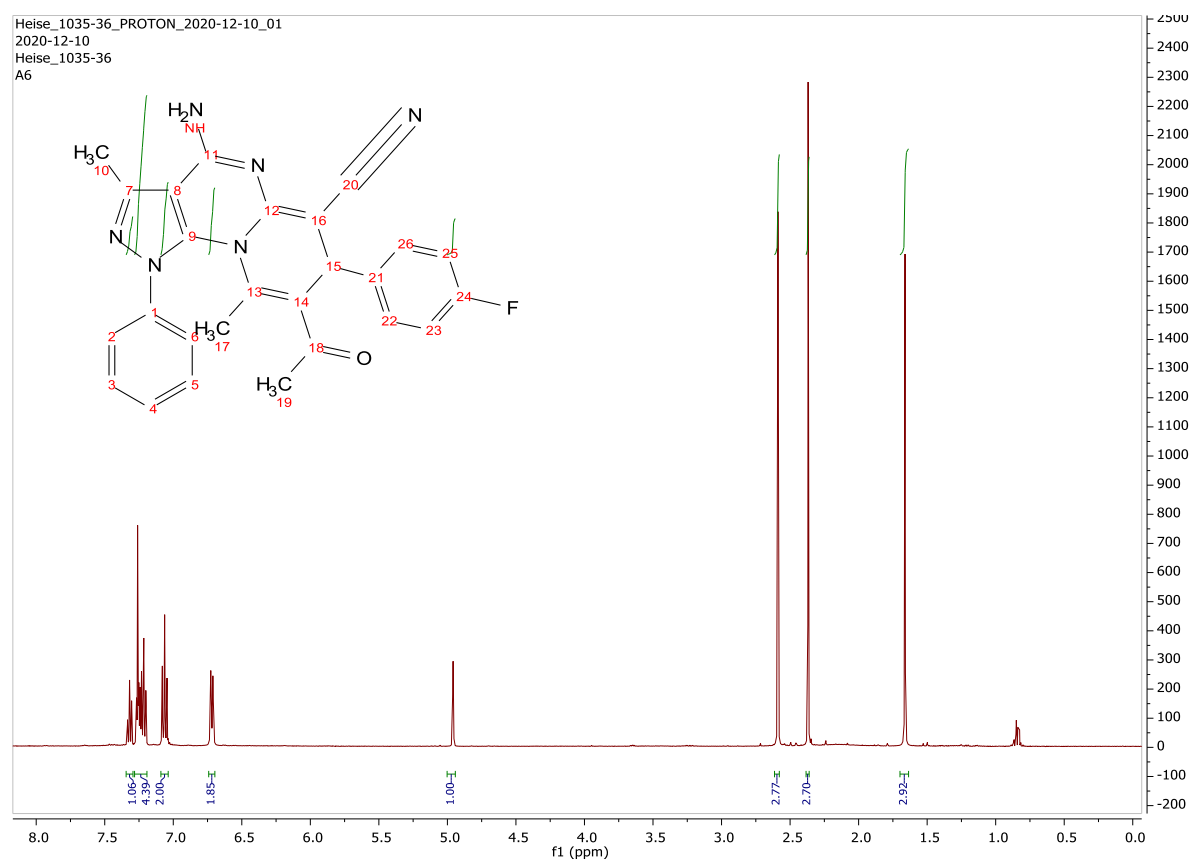

$^{13}\text{C}$  NMR (126 MHz,  $\text{CDCl}_3$ ):

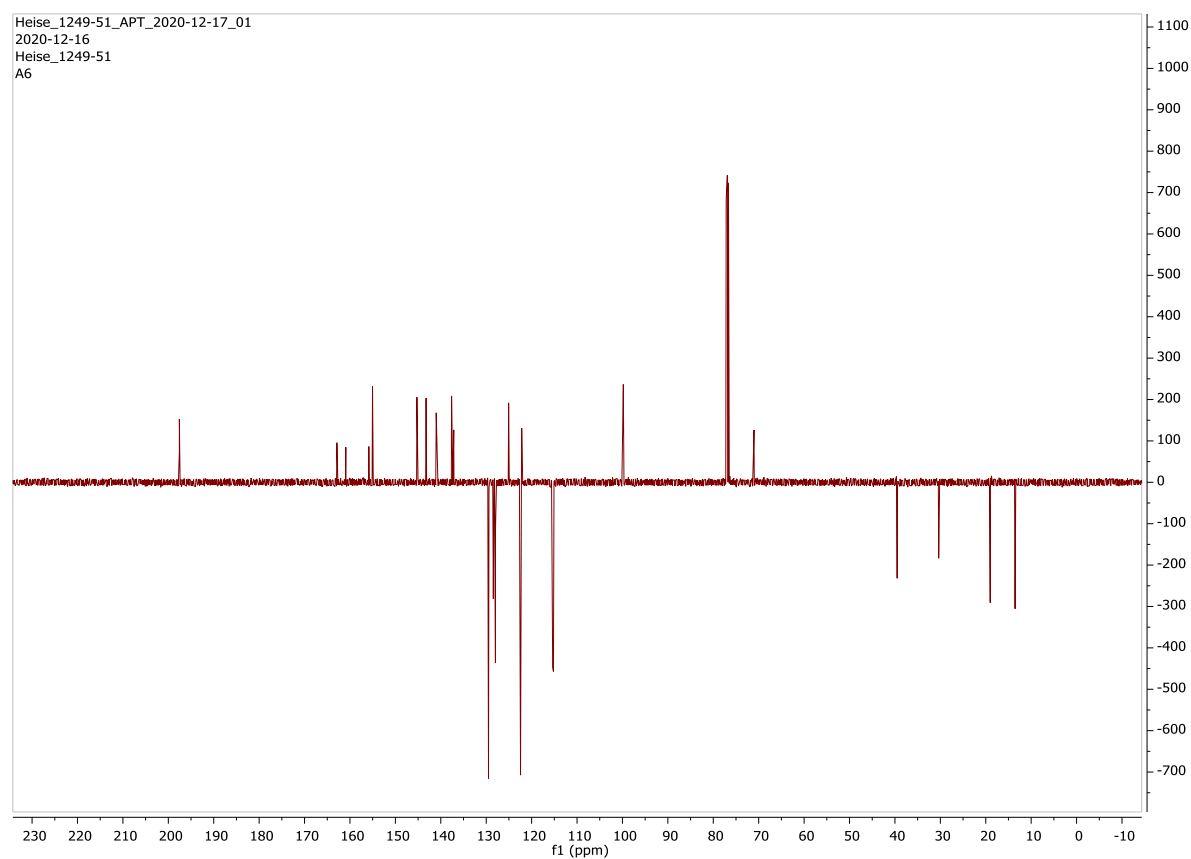

IR spectrum (ATR):

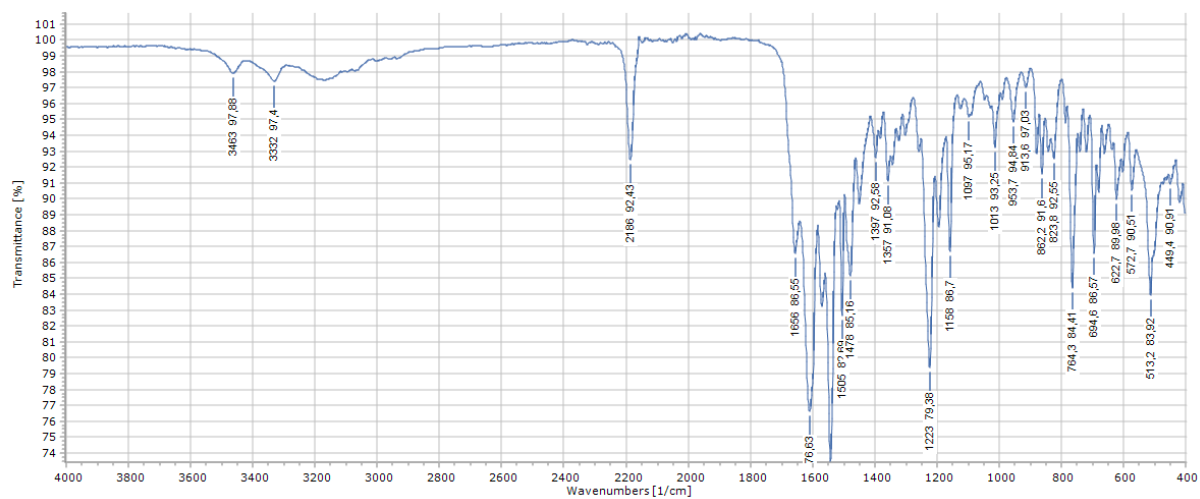

## Spectra of 7g:

$^1\text{H}$  NMR (500 MHz,  $\text{CDCl}_3$ ):

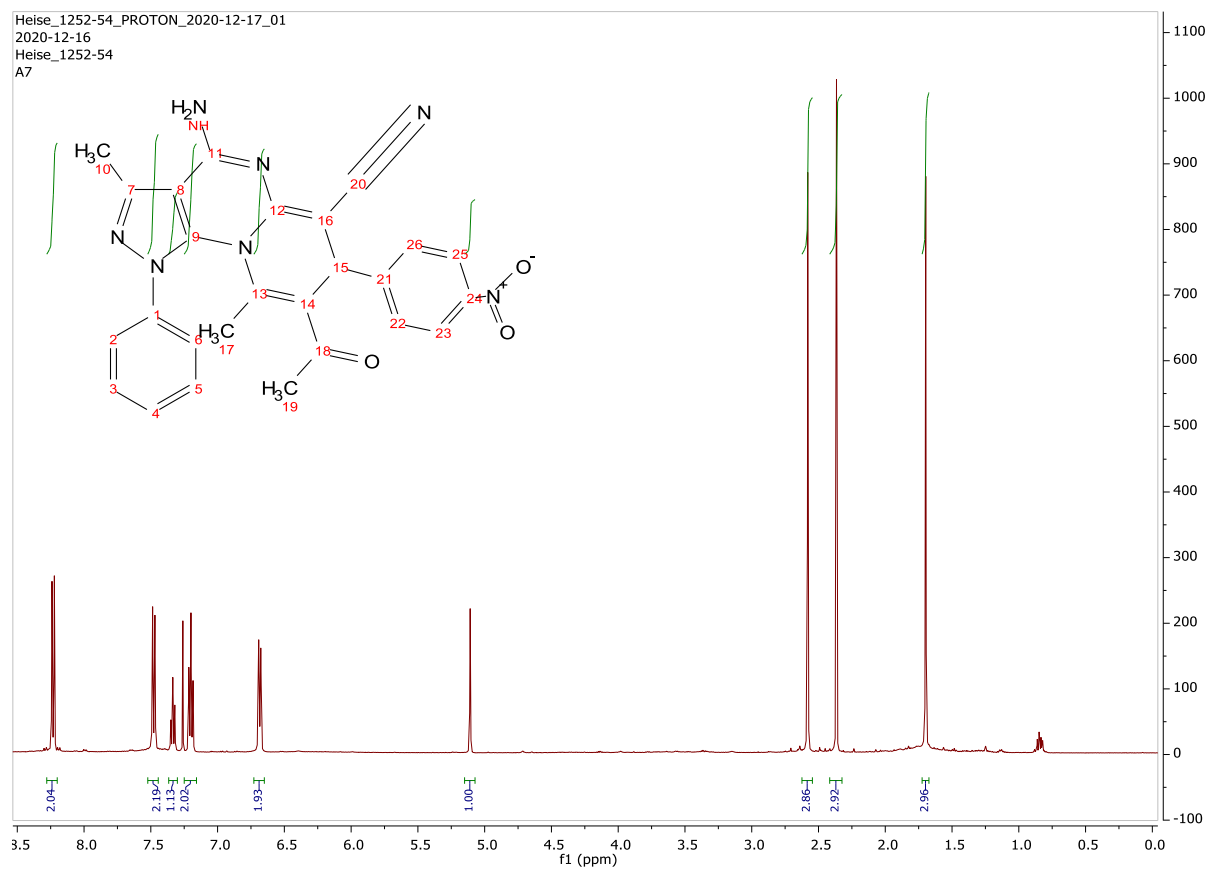

$^{13}\text{C}$  NMR (126 MHz,  $\text{CDCl}_3$ ):

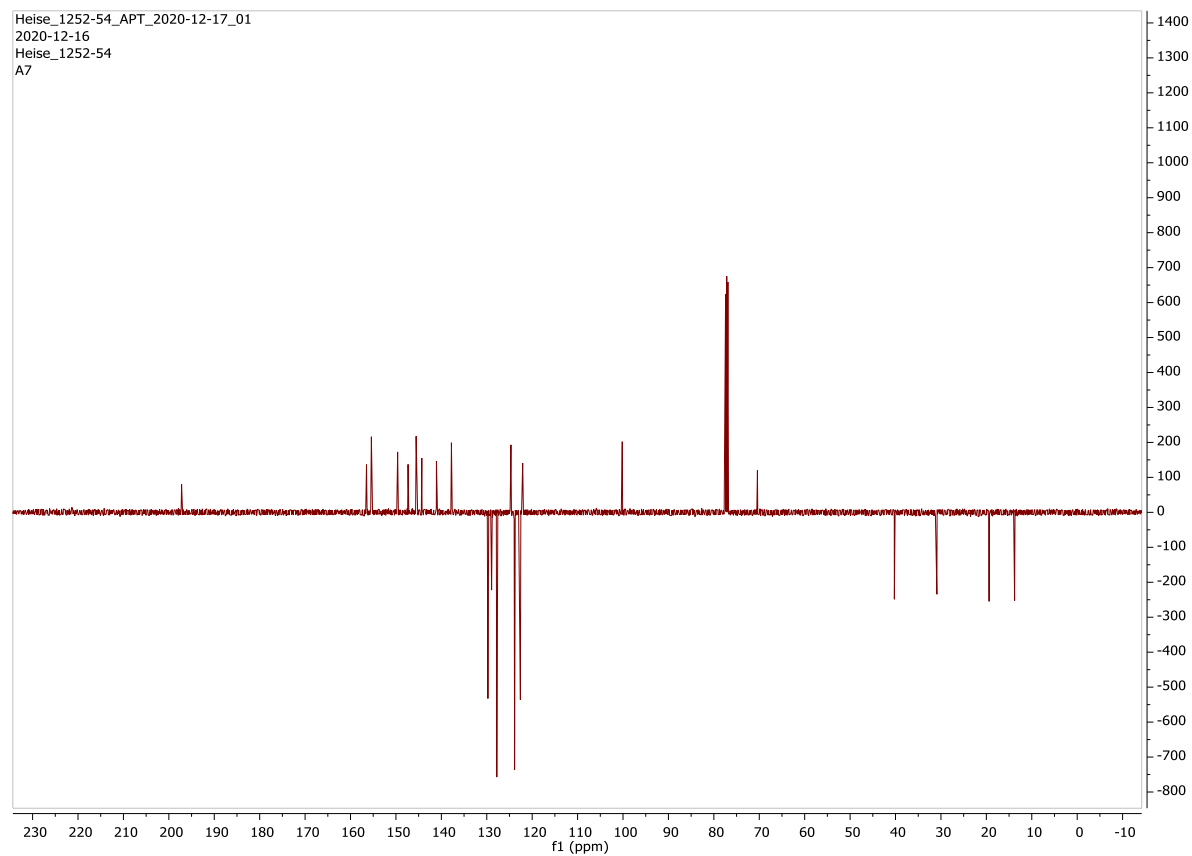

IR spectrum (ATR):

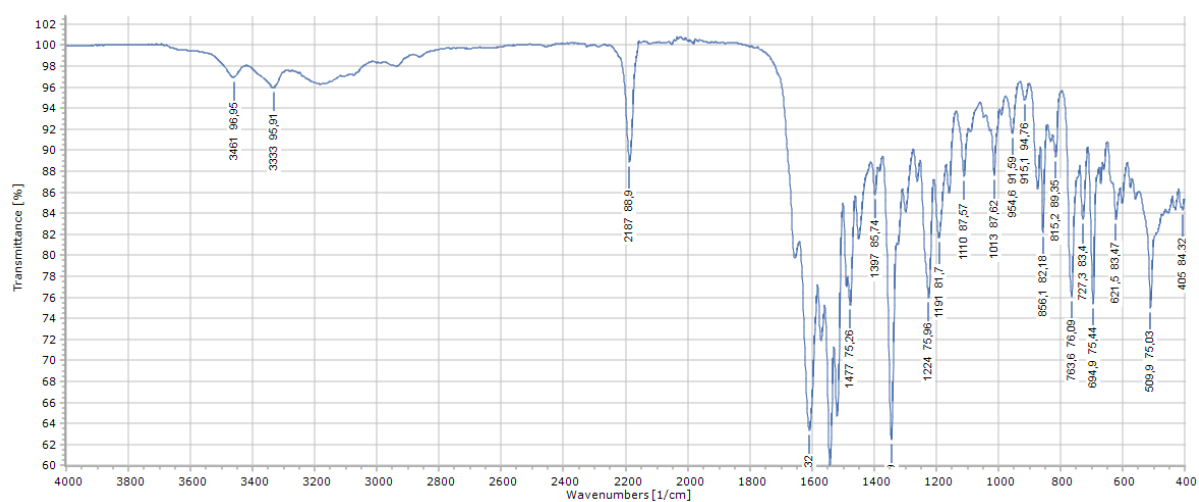

Spectra of 7h:

$^1\text{H}$  NMR (500 MHz,  $\text{CDCl}_3$ ):

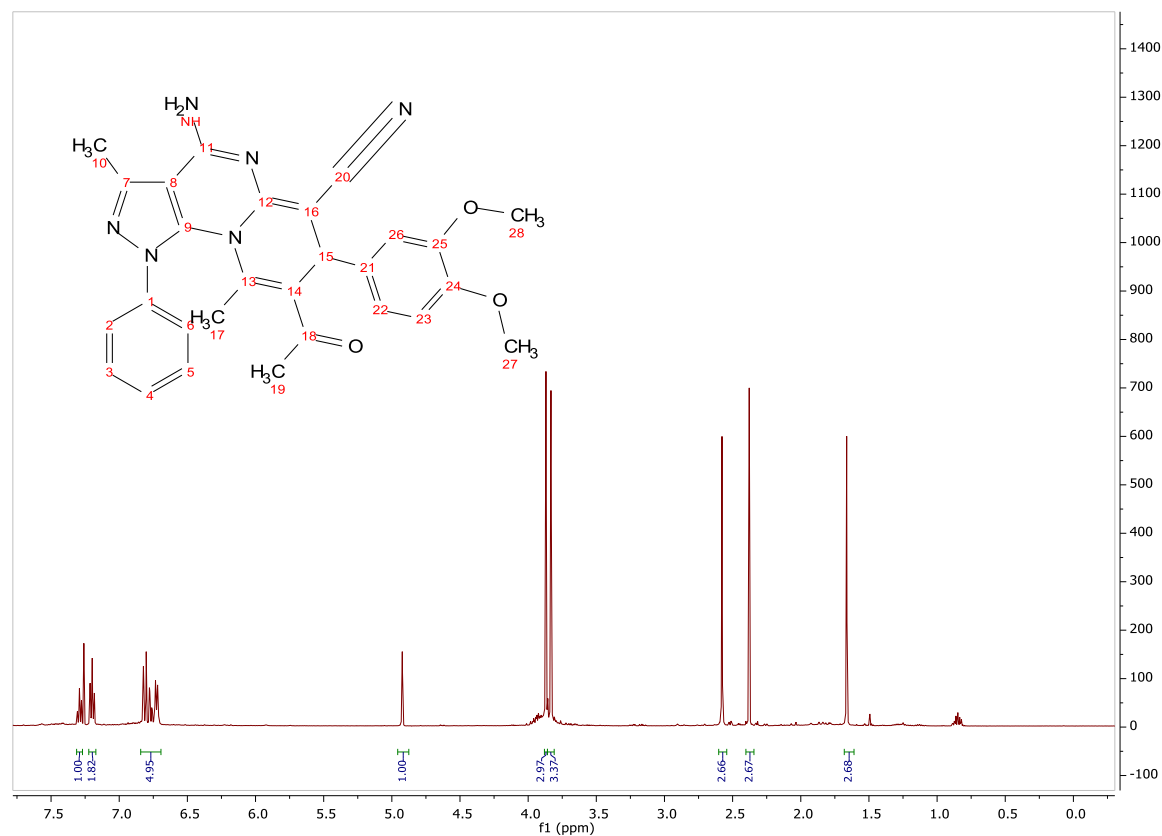



$^{13}\text{C}$  NMR (126 MHz,  $\text{CDCl}_3$ ):

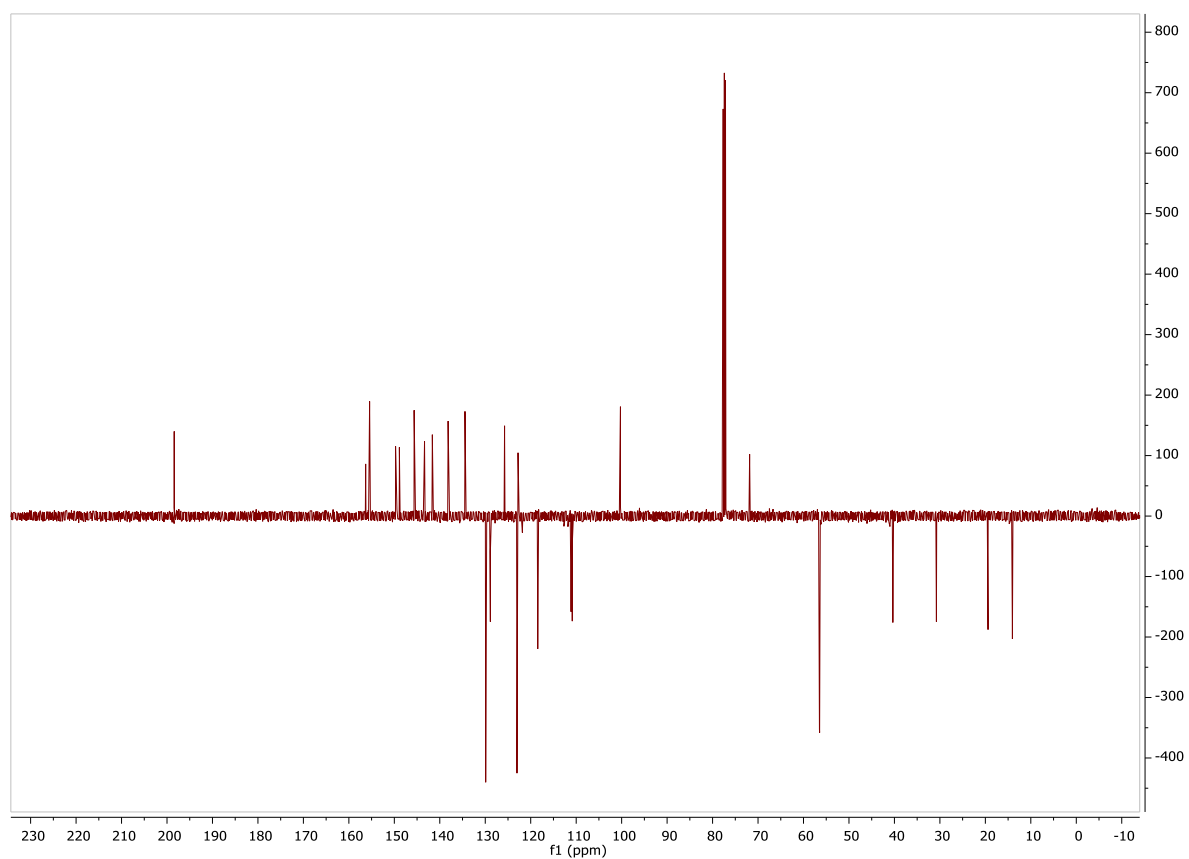

IR spectrum (ATR):

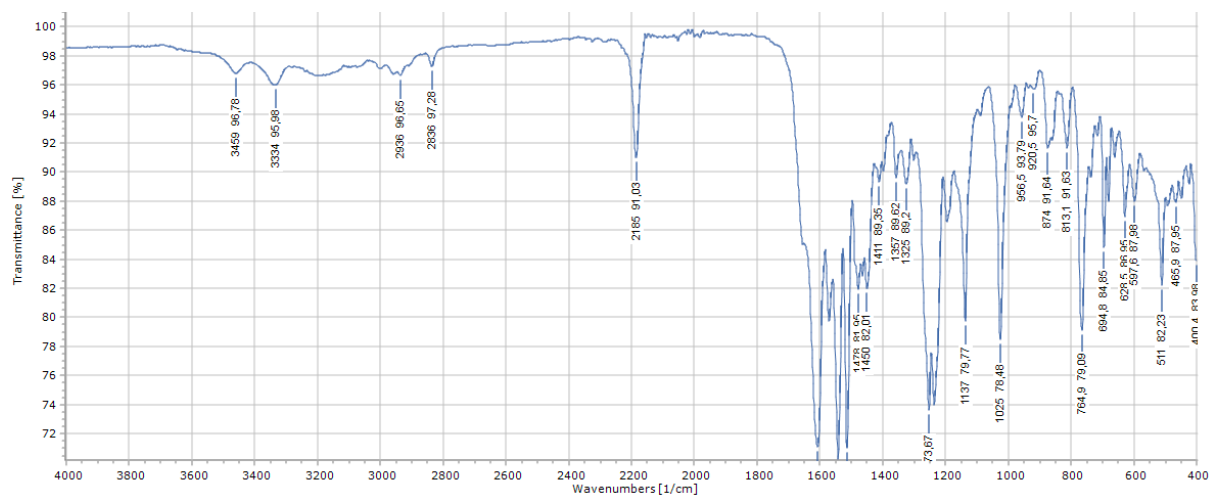

## Spectra of 7i:

$^1\text{H}$  NMR (500 MHz,  $\text{CDCl}_3$ ):

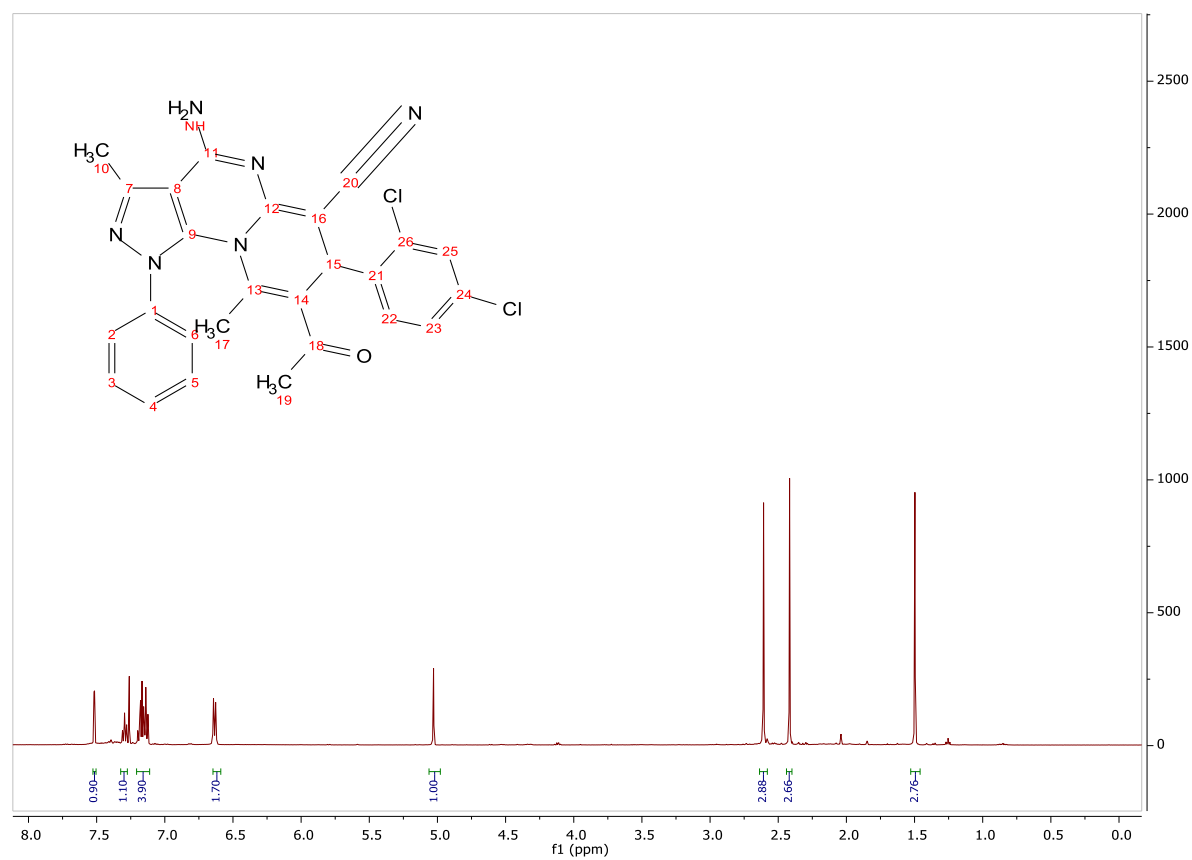

$^{13}\text{C}$  NMR (126 MHz,  $\text{CDCl}_3$ ):

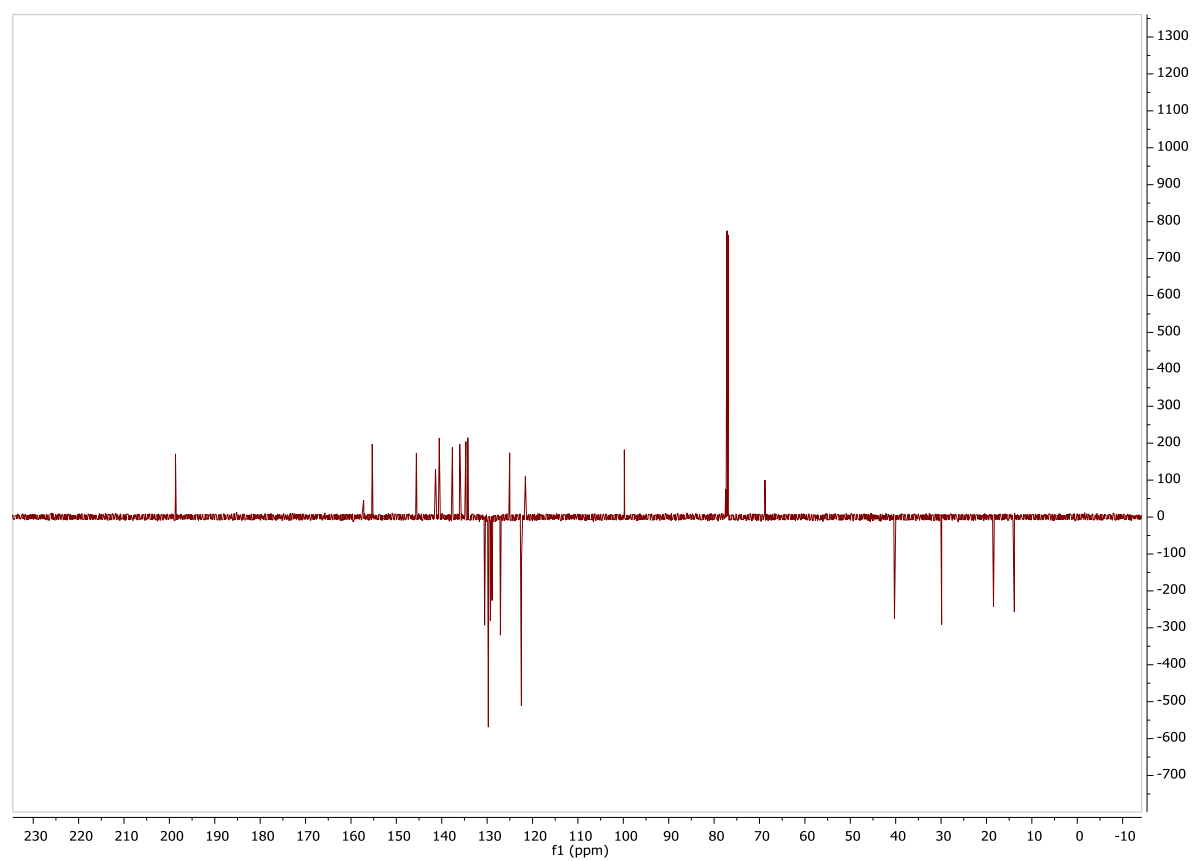

IR spectrum (ATR):

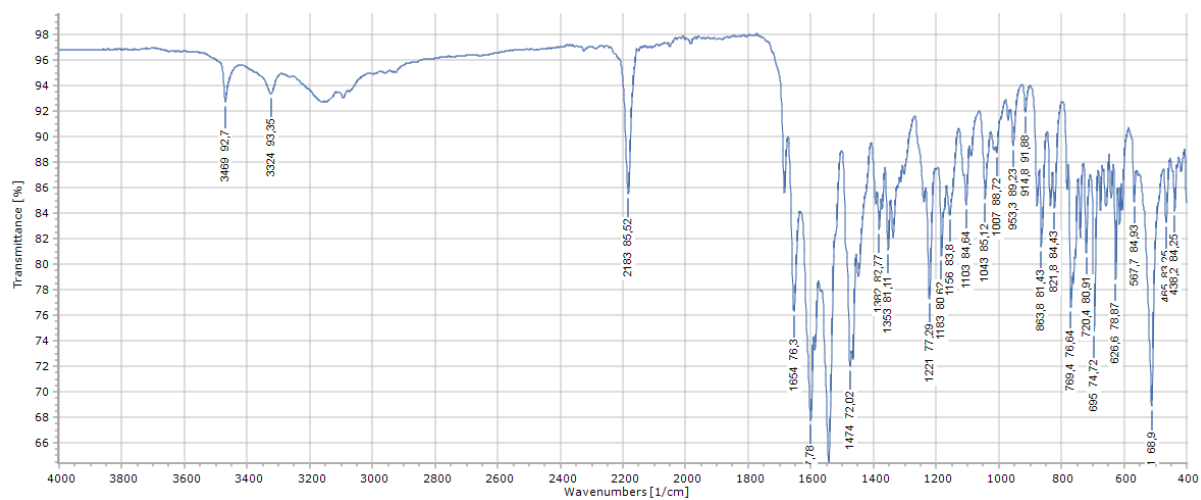

Spectra of 7j:

$^1\text{H}$  NMR (500 MHz,  $\text{CDCl}_3$ ):

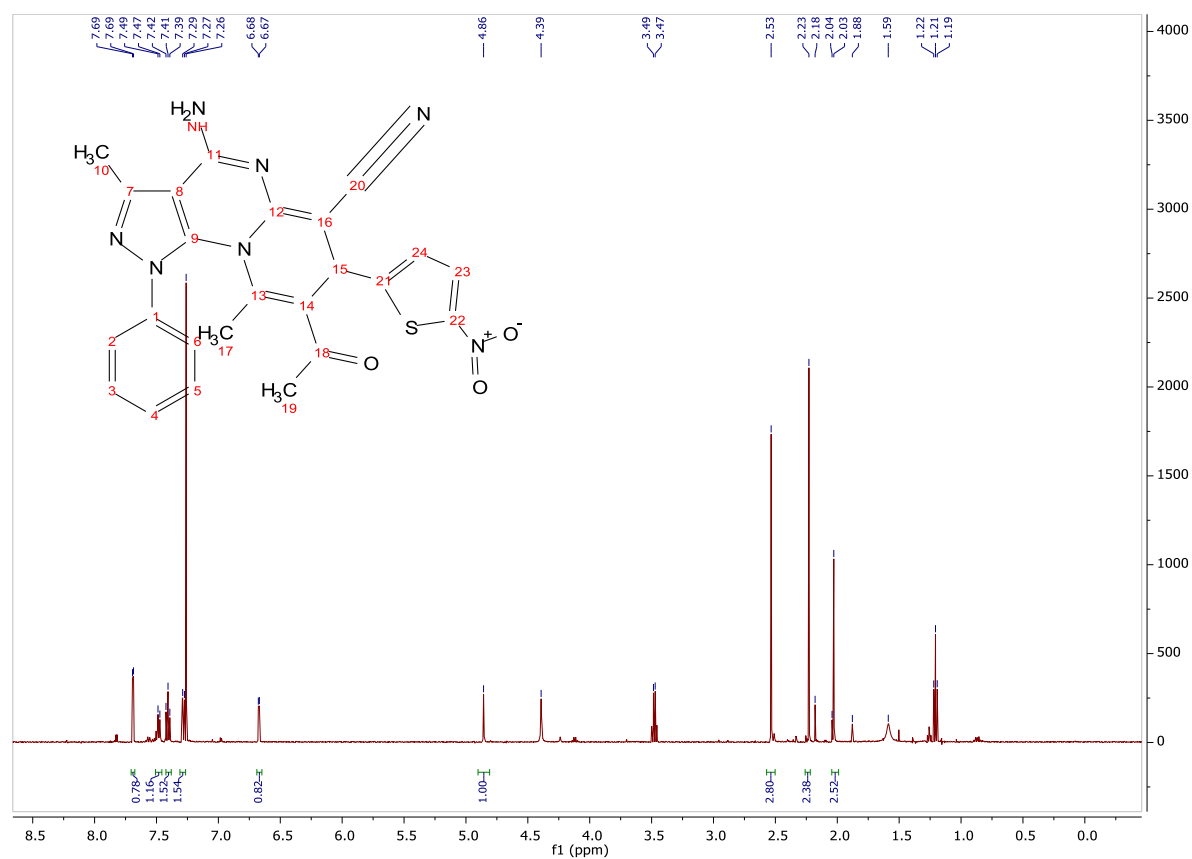

$^{13}\text{C}$  NMR (126 MHz,  $\text{CDCl}_3$ ):

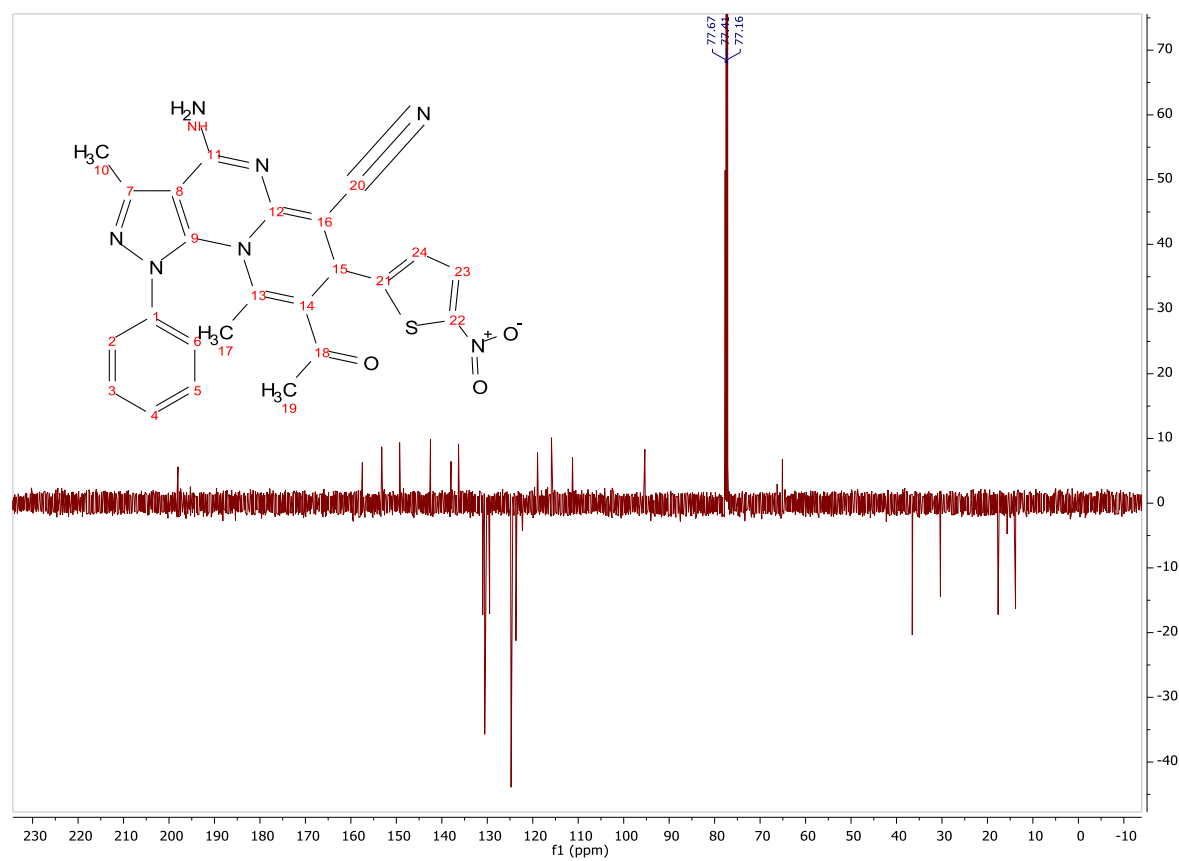

IR spectrum (ATR):

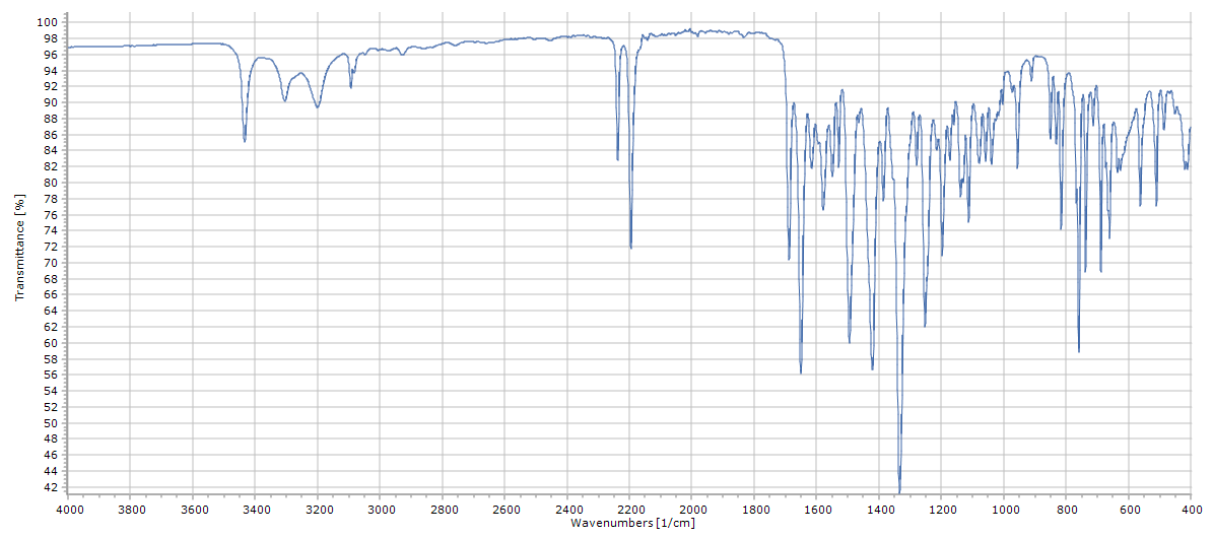

## Spectra of 7k:

$^1\text{H}$  NMR (500 MHz,  $\text{CDCl}_3$ ):

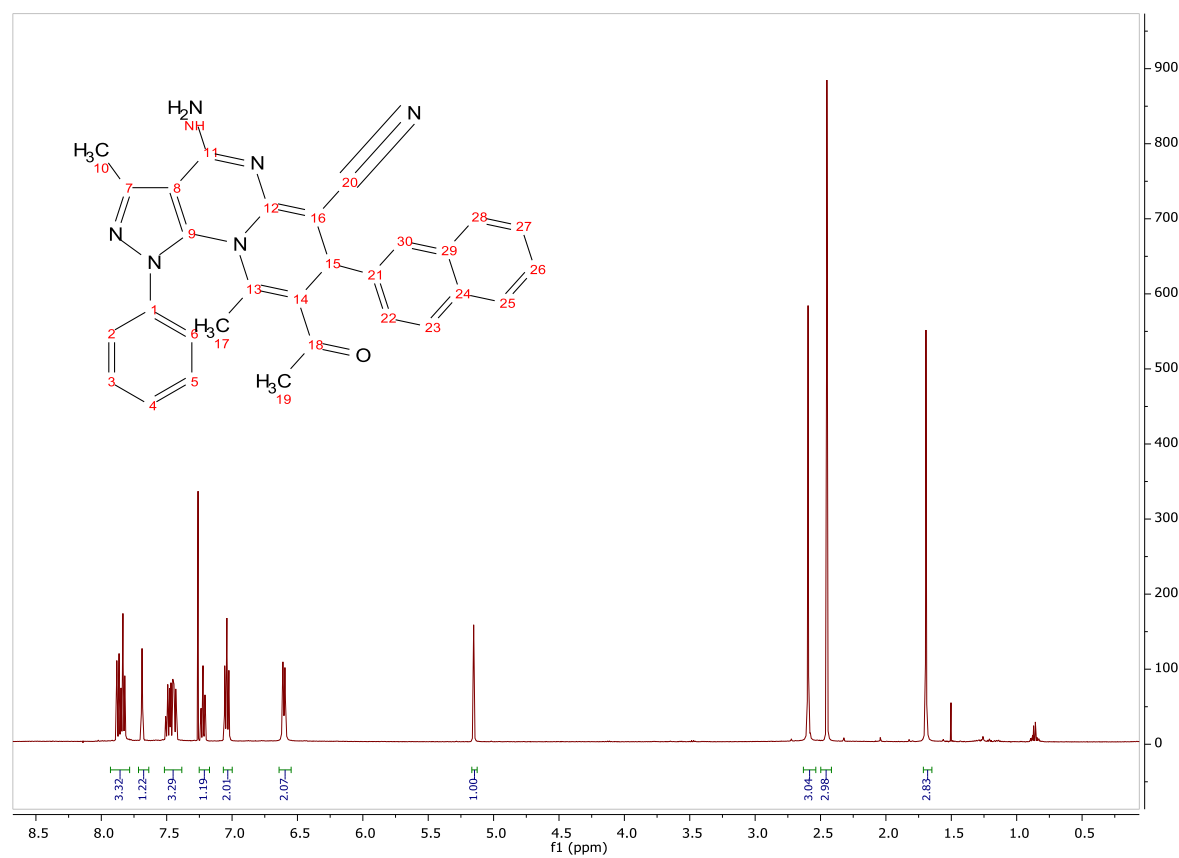

$^{13}\text{C}$  NMR (126 MHz,  $\text{CDCl}_3$ ):

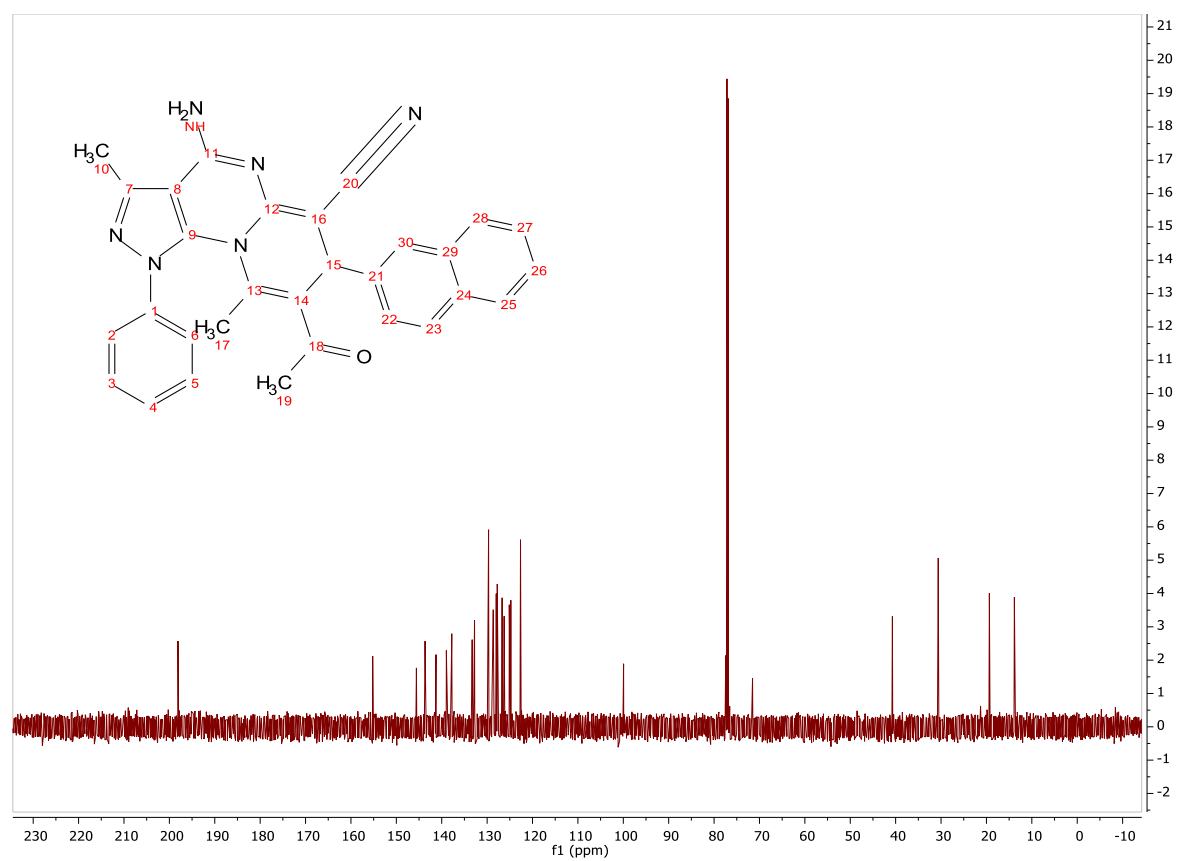

IR spectrum (ATR):

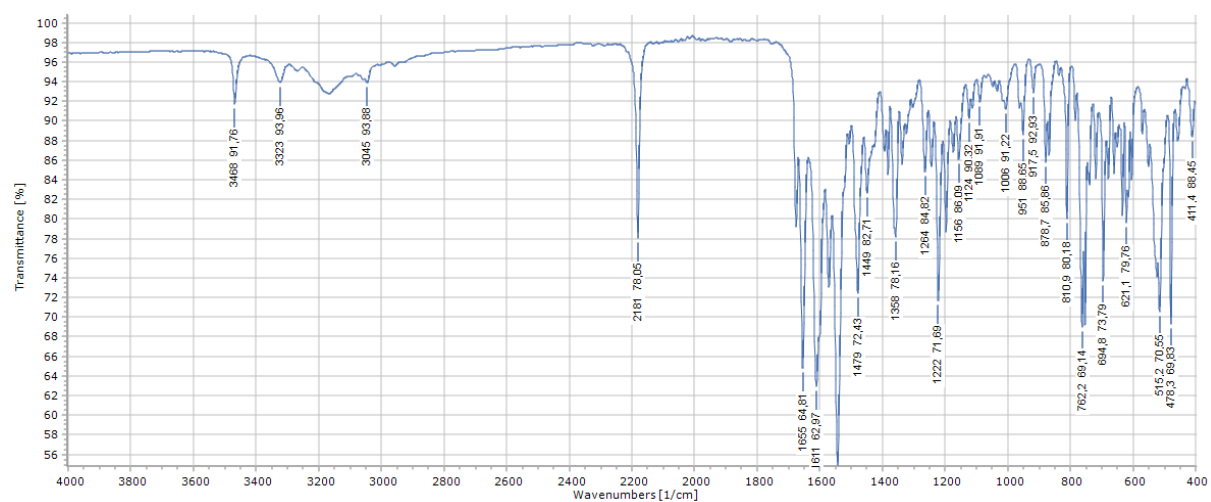

### Spectra of 7l:

<sup>1</sup>H NMR (500 MHz, CDCl<sub>3</sub>):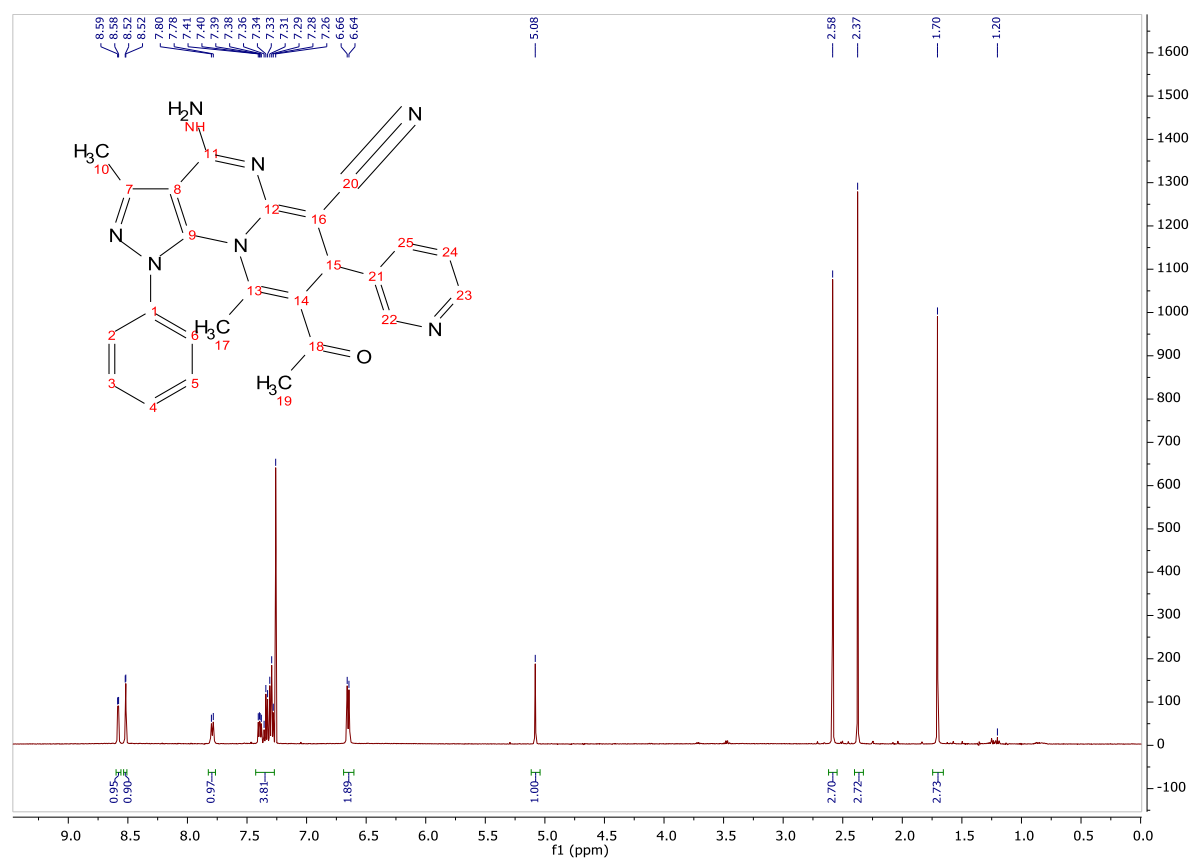

$^{13}\text{C}$  NMR (126 MHz,  $\text{CDCl}_3$ ):

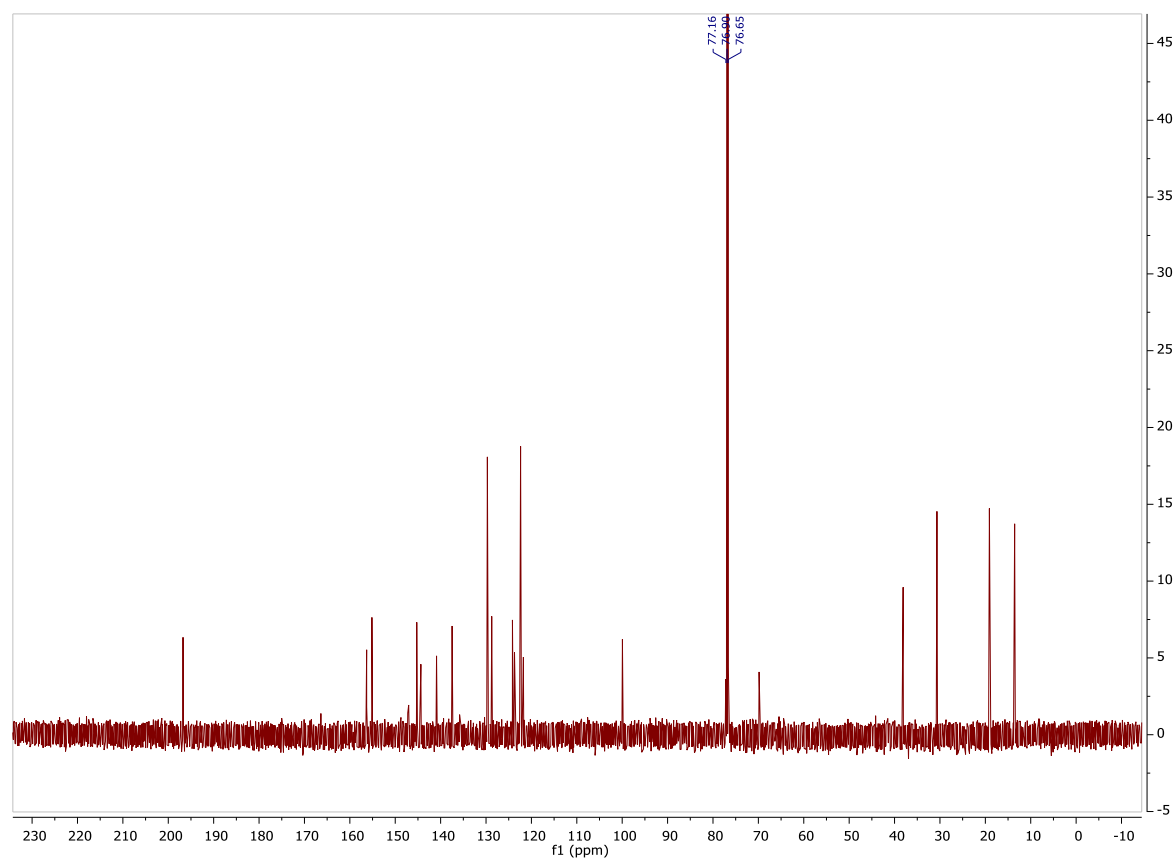

IR spectrum (ATR):

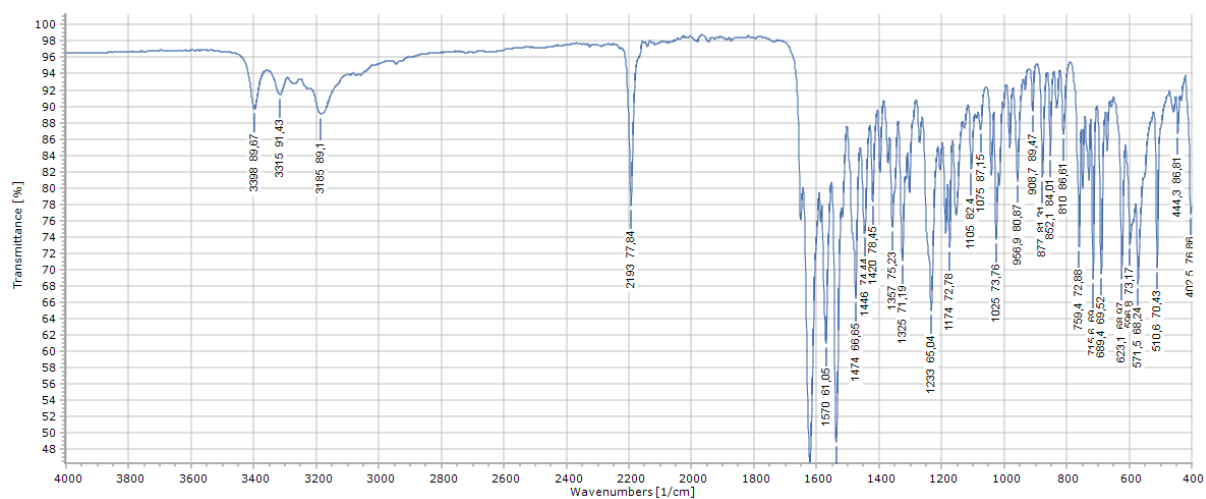

Supplement: Supplementary file 1 [file supplementary]
